# Supplementary material for: Synthesis and biological evaluation of coprinoferrin, an acylated tripeptide hydroxamate siderophore
Source: Royal Society of Chemistry journal article supplement (doi:10.1039/d3ob01850d), 2023-12-21
Supplement: d3ob01850d1.pdf [file d3ob01850d1.pdf]

## *Electronic Supplementary Information*

### **Synthesis and biological evaluation of coprinoferrin, an acylated tripeptide hydroxamate siderophore**

Ichiro Hayakawa,<sup>\*a</sup> Tomoki Isogai,<sup>b</sup> Jun Takanishi,<sup>c</sup> Shihori Asai,<sup>c</sup> Chika Ando,<sup>d</sup> Tomohiro Tsutsumi,<sup>a</sup> Kenji Watanabe,<sup>\*c</sup> Akira Sakakura,<sup>\*b</sup> Yuta Tsunematsu<sup>\*d</sup>

<sup>a</sup>. Graduate School of Integrated Basic Sciences, Nihon University, 3-25-40 Sakurajosui, Setagaya-ku, Tokyo 156-8550, Japan

E-mail: hayakawa.ichiro@nihon-u.ac.jp

<sup>b</sup>. Division of Applied Chemistry, Graduate School of Natural Science and Technology, Okayama University, 3-1-1 Tsushima-naka, Kita-ku, Okayama 700-8530, Japan

E-mail: sakakura@okayama-u.ac.jp

<sup>c</sup>. Department of Pharmaceutical Sciences, University of Shizuoka, 52-1 Yada, Suruga-ku, Shizuoka 422-8526, Japan

E-mail: kenji55@u-shizuoka-ken.ac.jp

<sup>d</sup>. Graduate School of Bioagricultural Sciences, Nagoya University, Furo-cho, Chikusa, Nagoya, Aichi, 464-8601, Japan

E-mail: tsune@agr.nagoya-u.ac.jp

### **Contents**

|                                                                                  | page |
|----------------------------------------------------------------------------------|------|
| 1. <sup>1</sup> H and <sup>13</sup> C NMR spectra of newly synthesized compounds | S2   |
| 2. Preparative HPLC chart of synthetic coprinoferrin ( <b>1</b> )                | S22  |



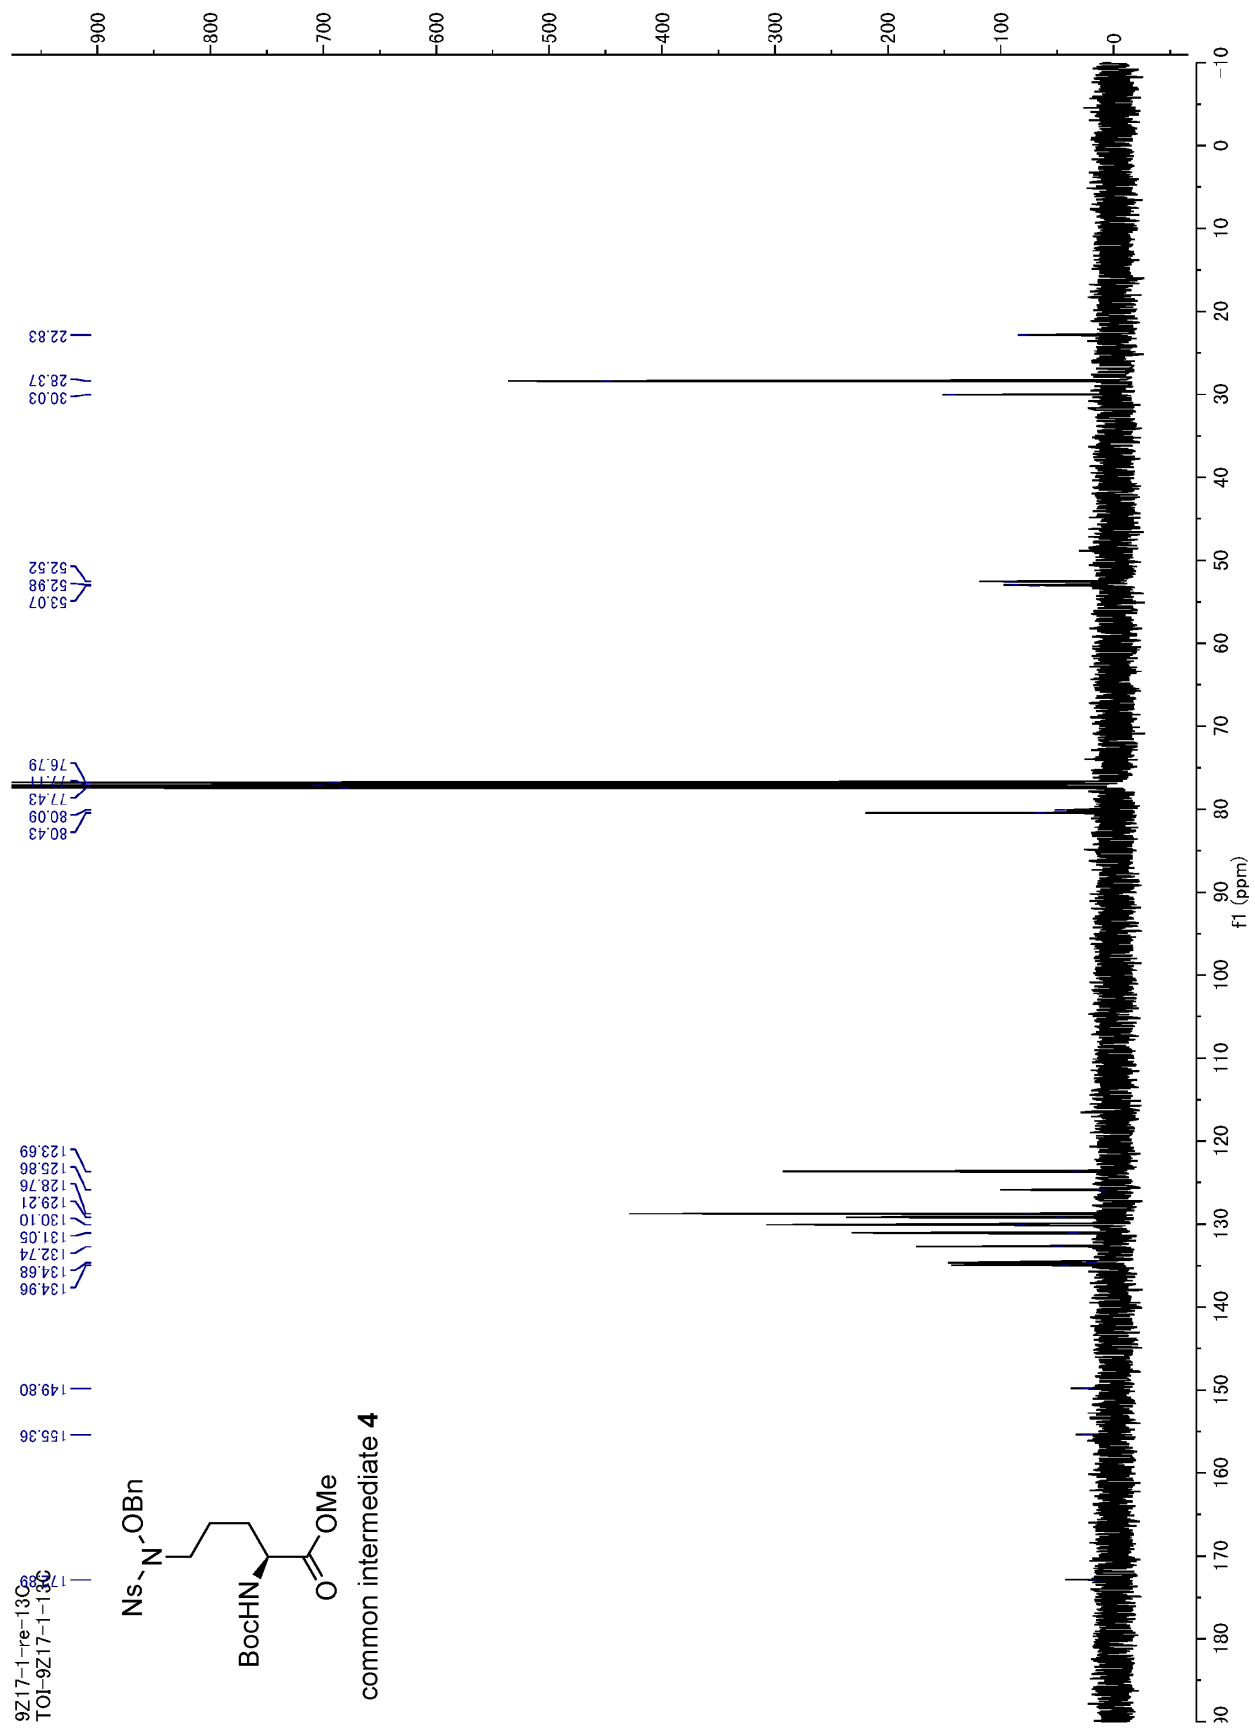

<sup>13</sup>C NMR spectra of common intermediate 4 (100 MHz, CDCl<sub>3</sub>)

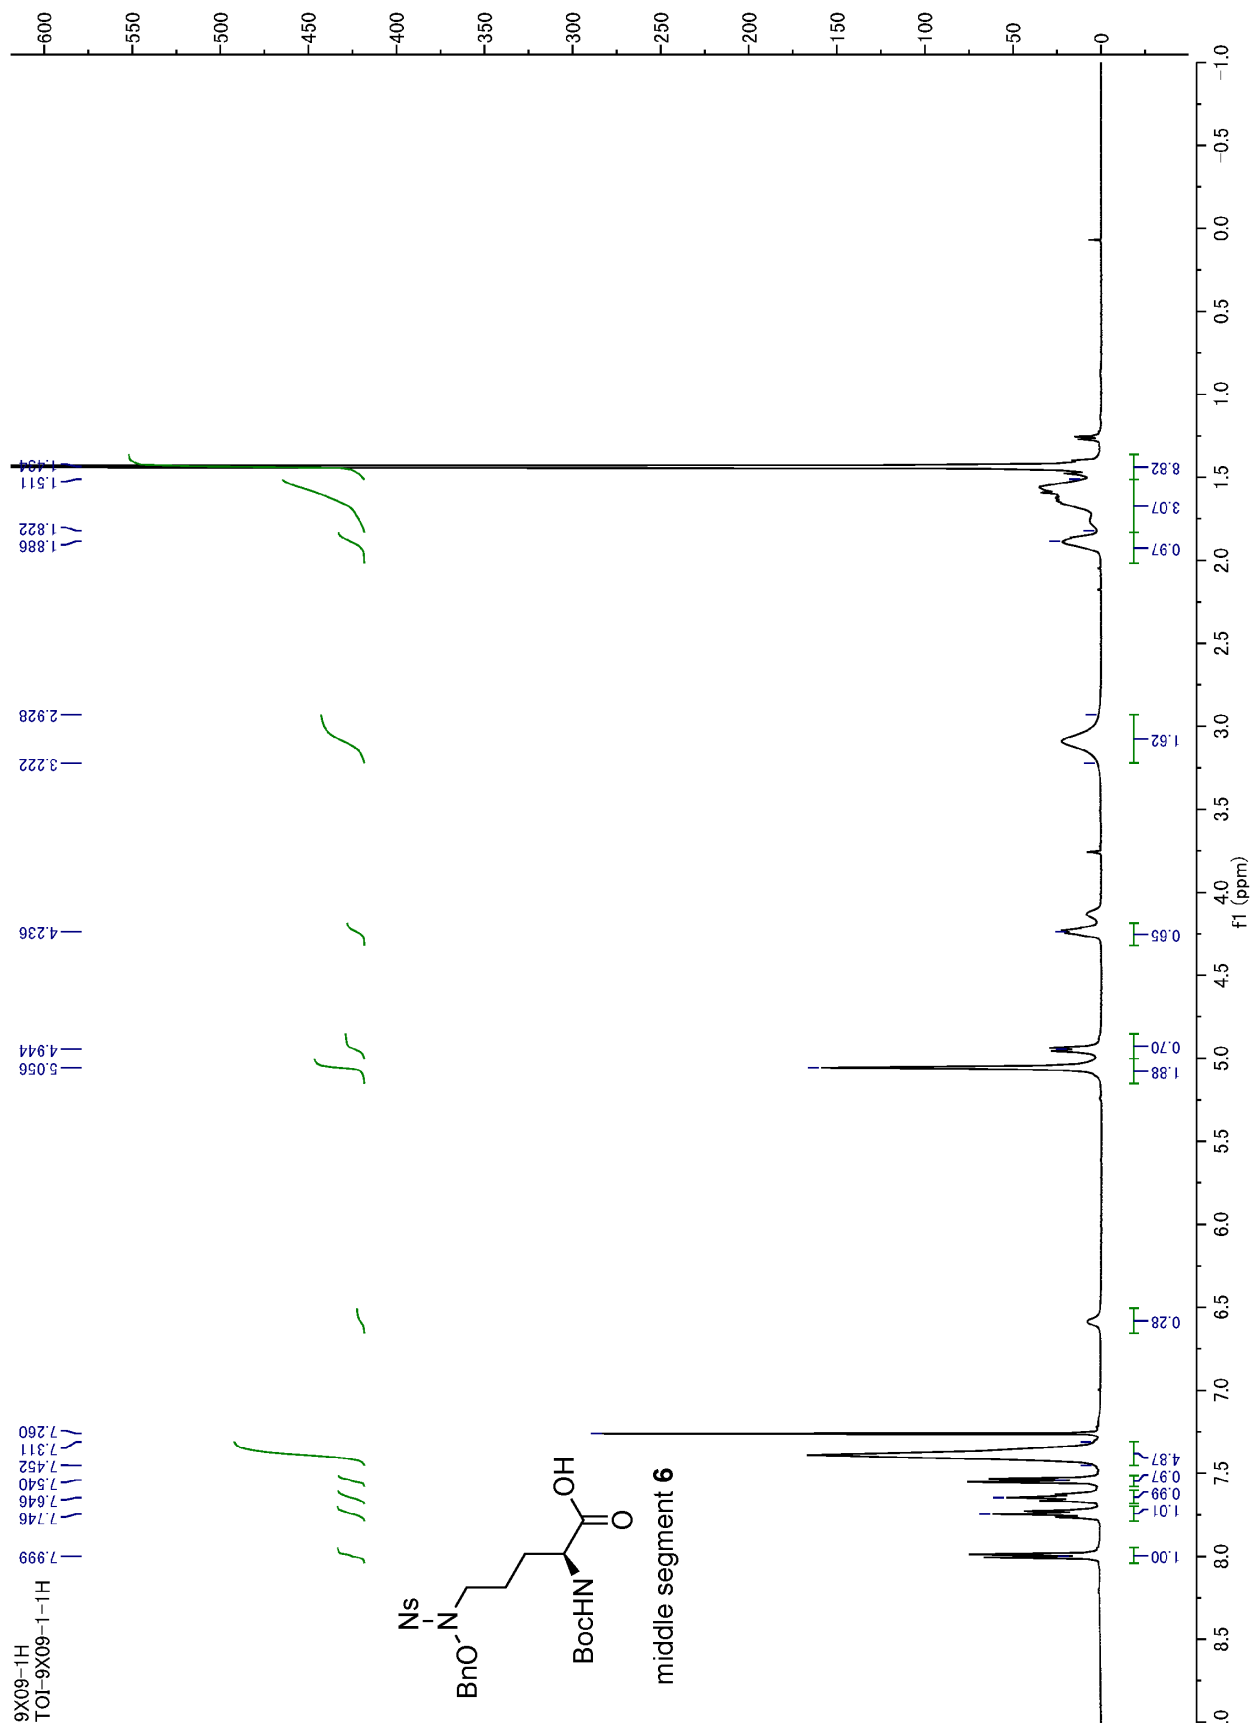

$^1\text{H}$  NMR spectra of middle segment **6** (400 MHz,  $\text{CDCl}_3$ )





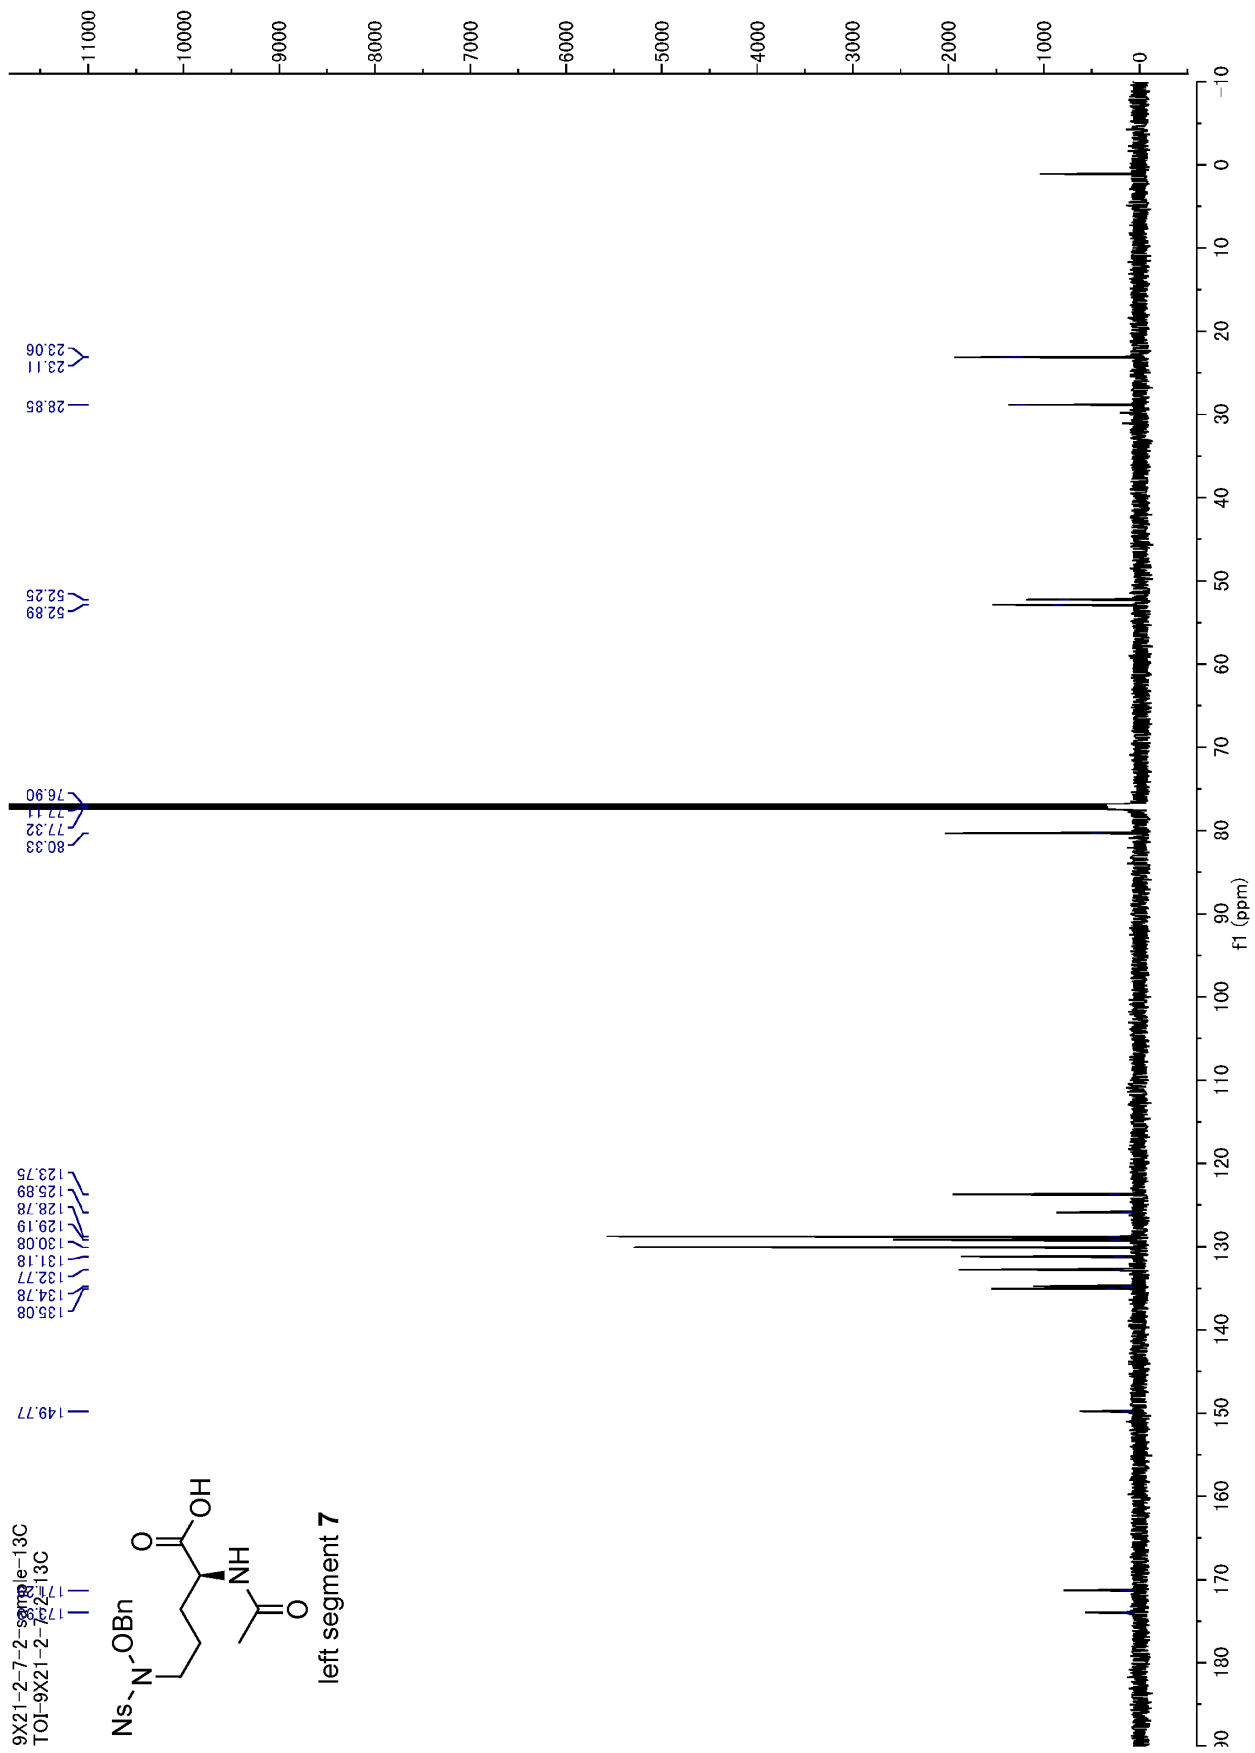

$^{13}\text{C}$  NMR spectra of left segment 7 (150 MHz,  $\text{CDCl}_3$ )

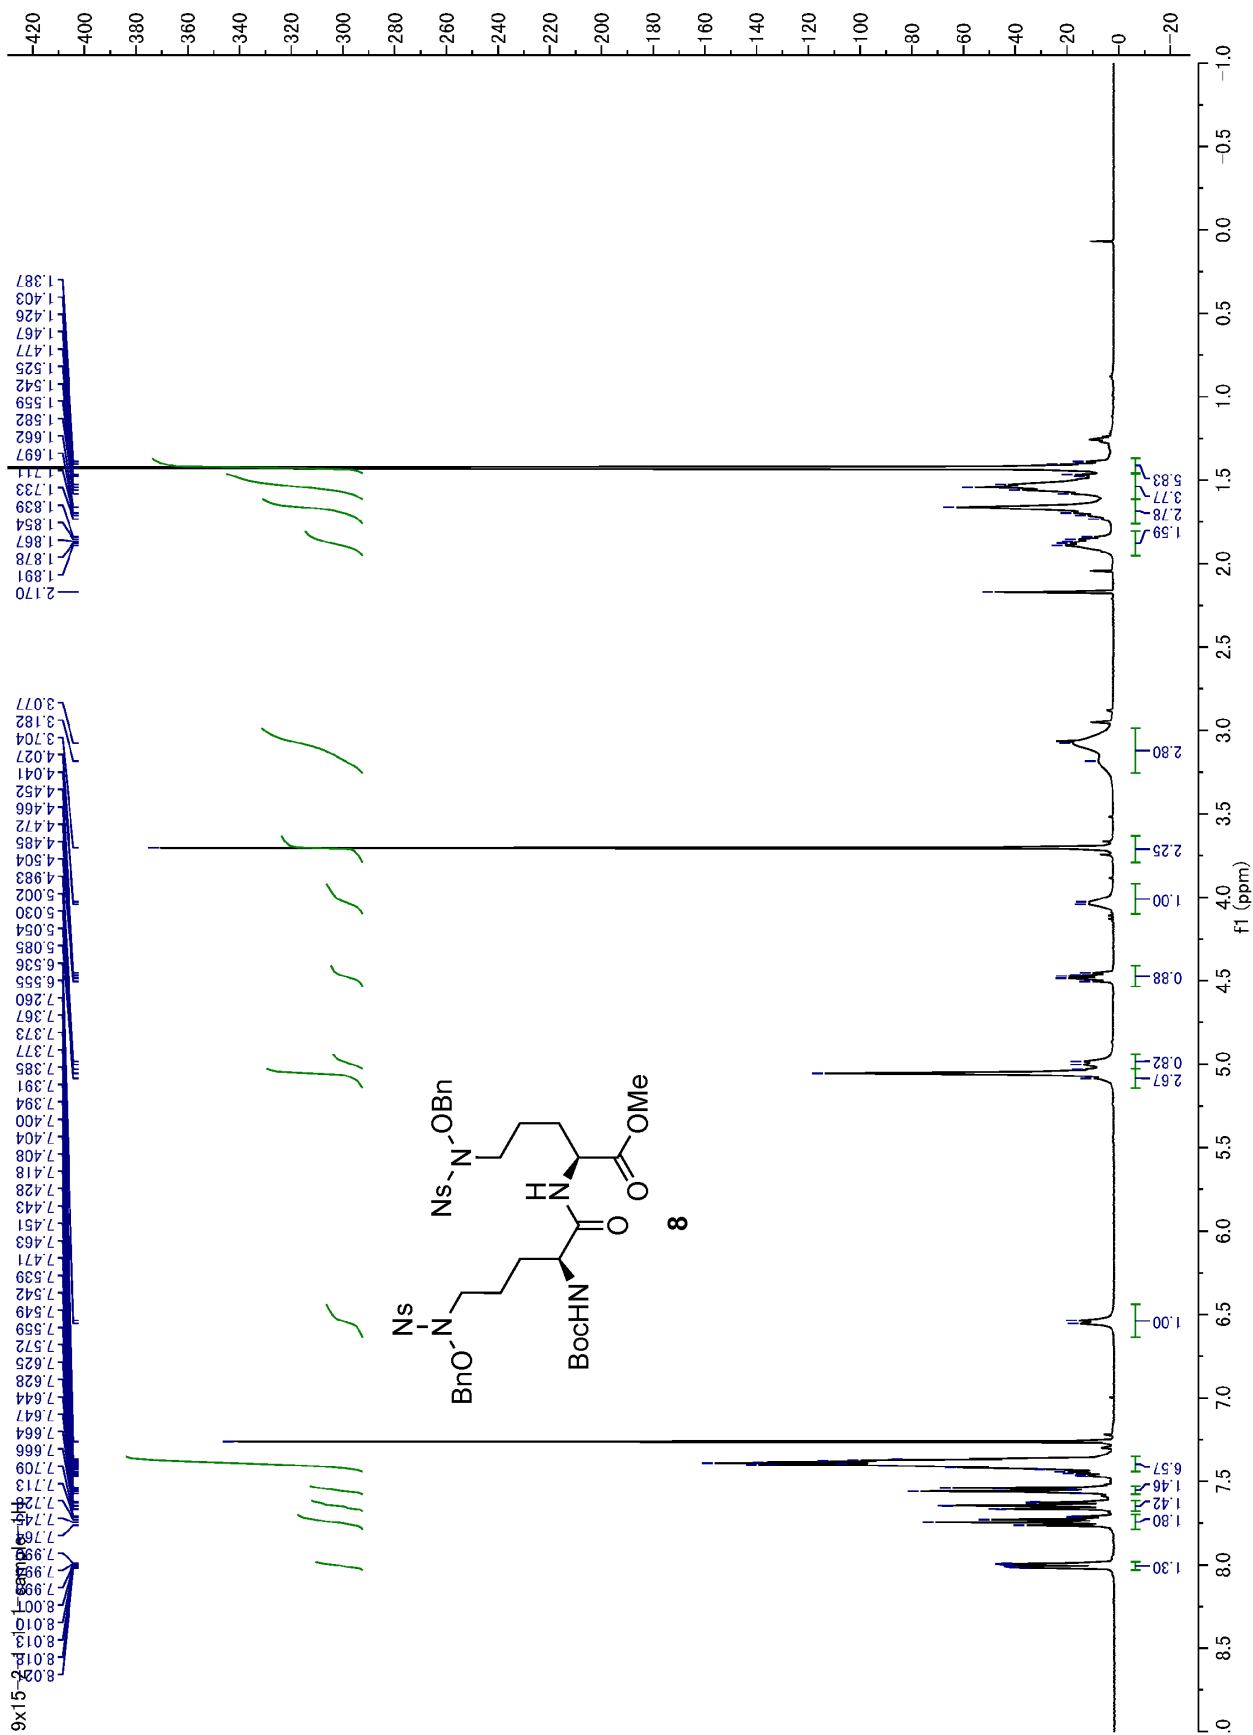

$^1\text{H}$  NMR spectra of **8** (400 MHz,  $\text{CDCl}_3$ )



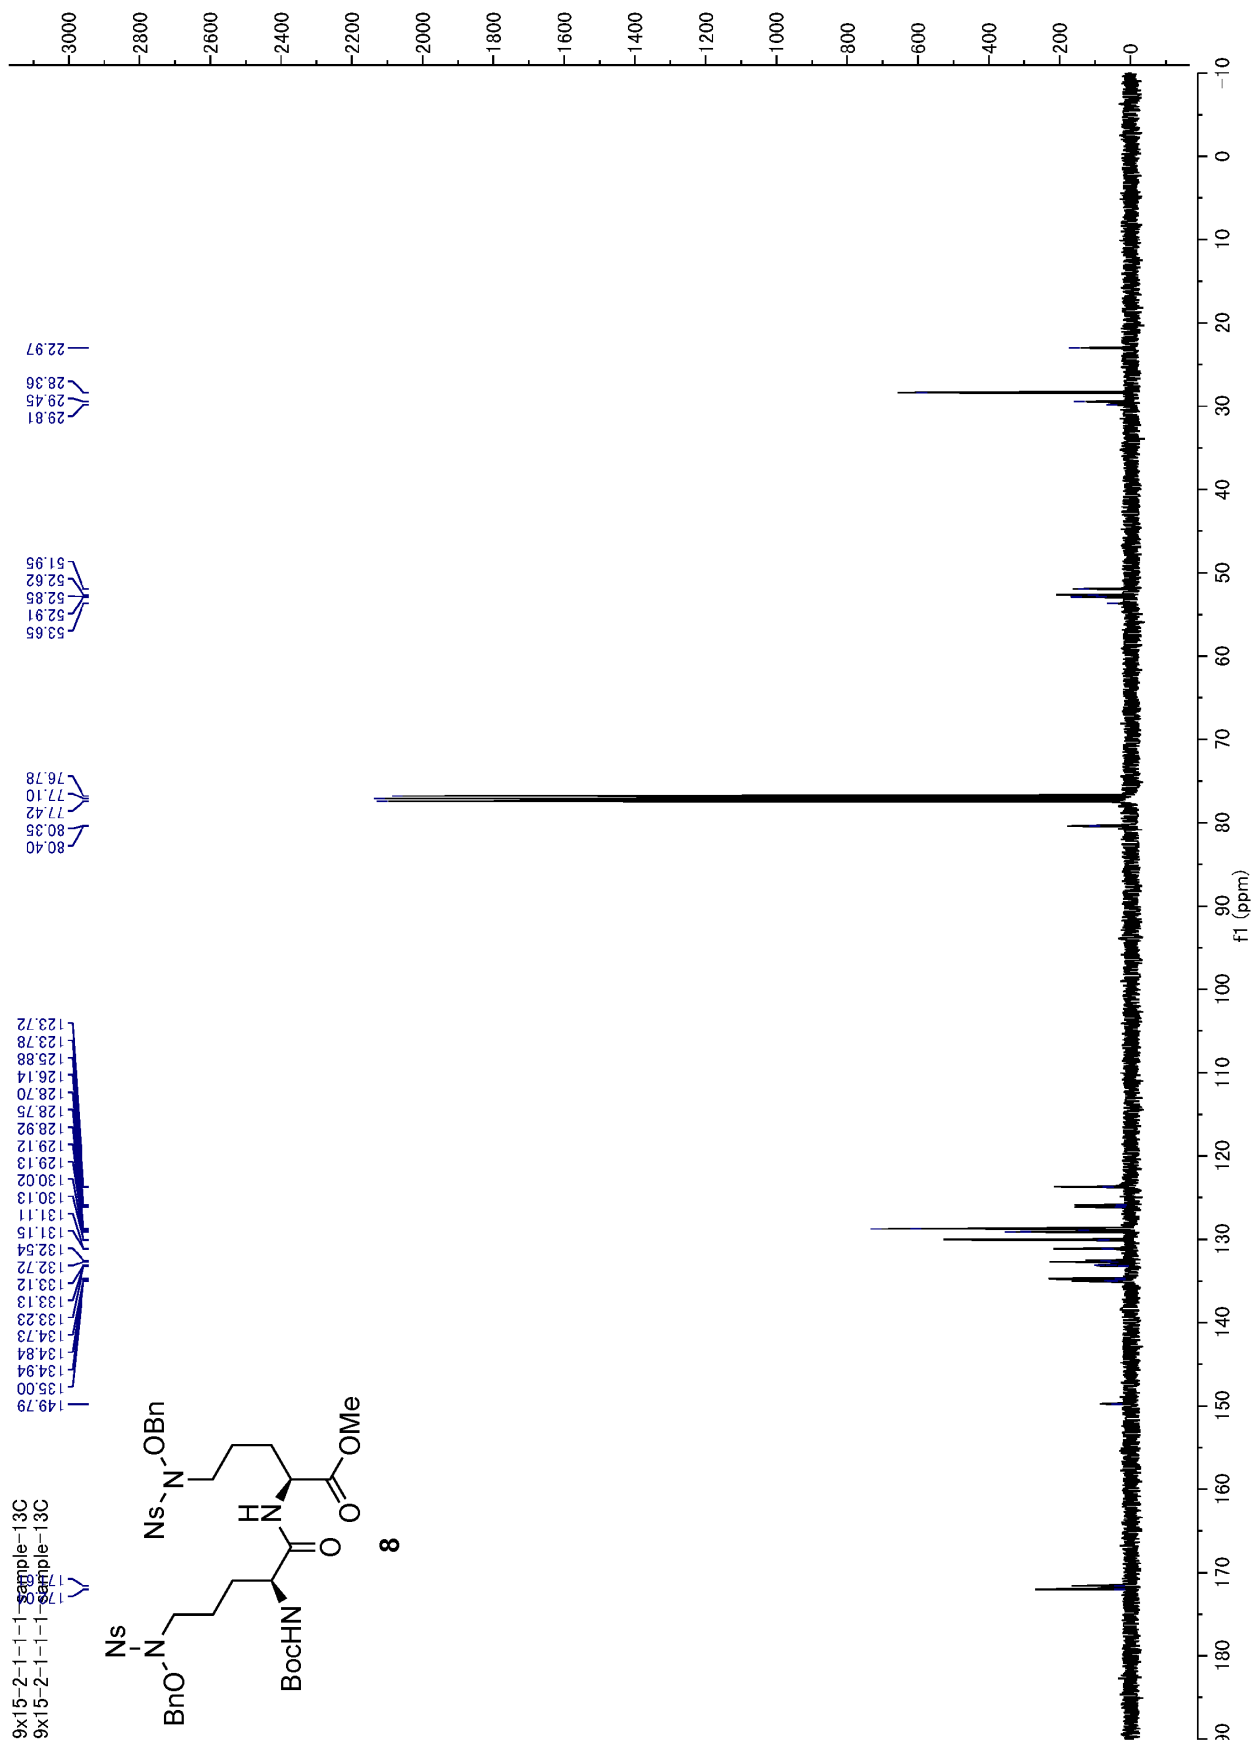

$^{13}\text{C}$  NMR spectra of **8** (100 MHz,  $\text{CDCl}_3$ )

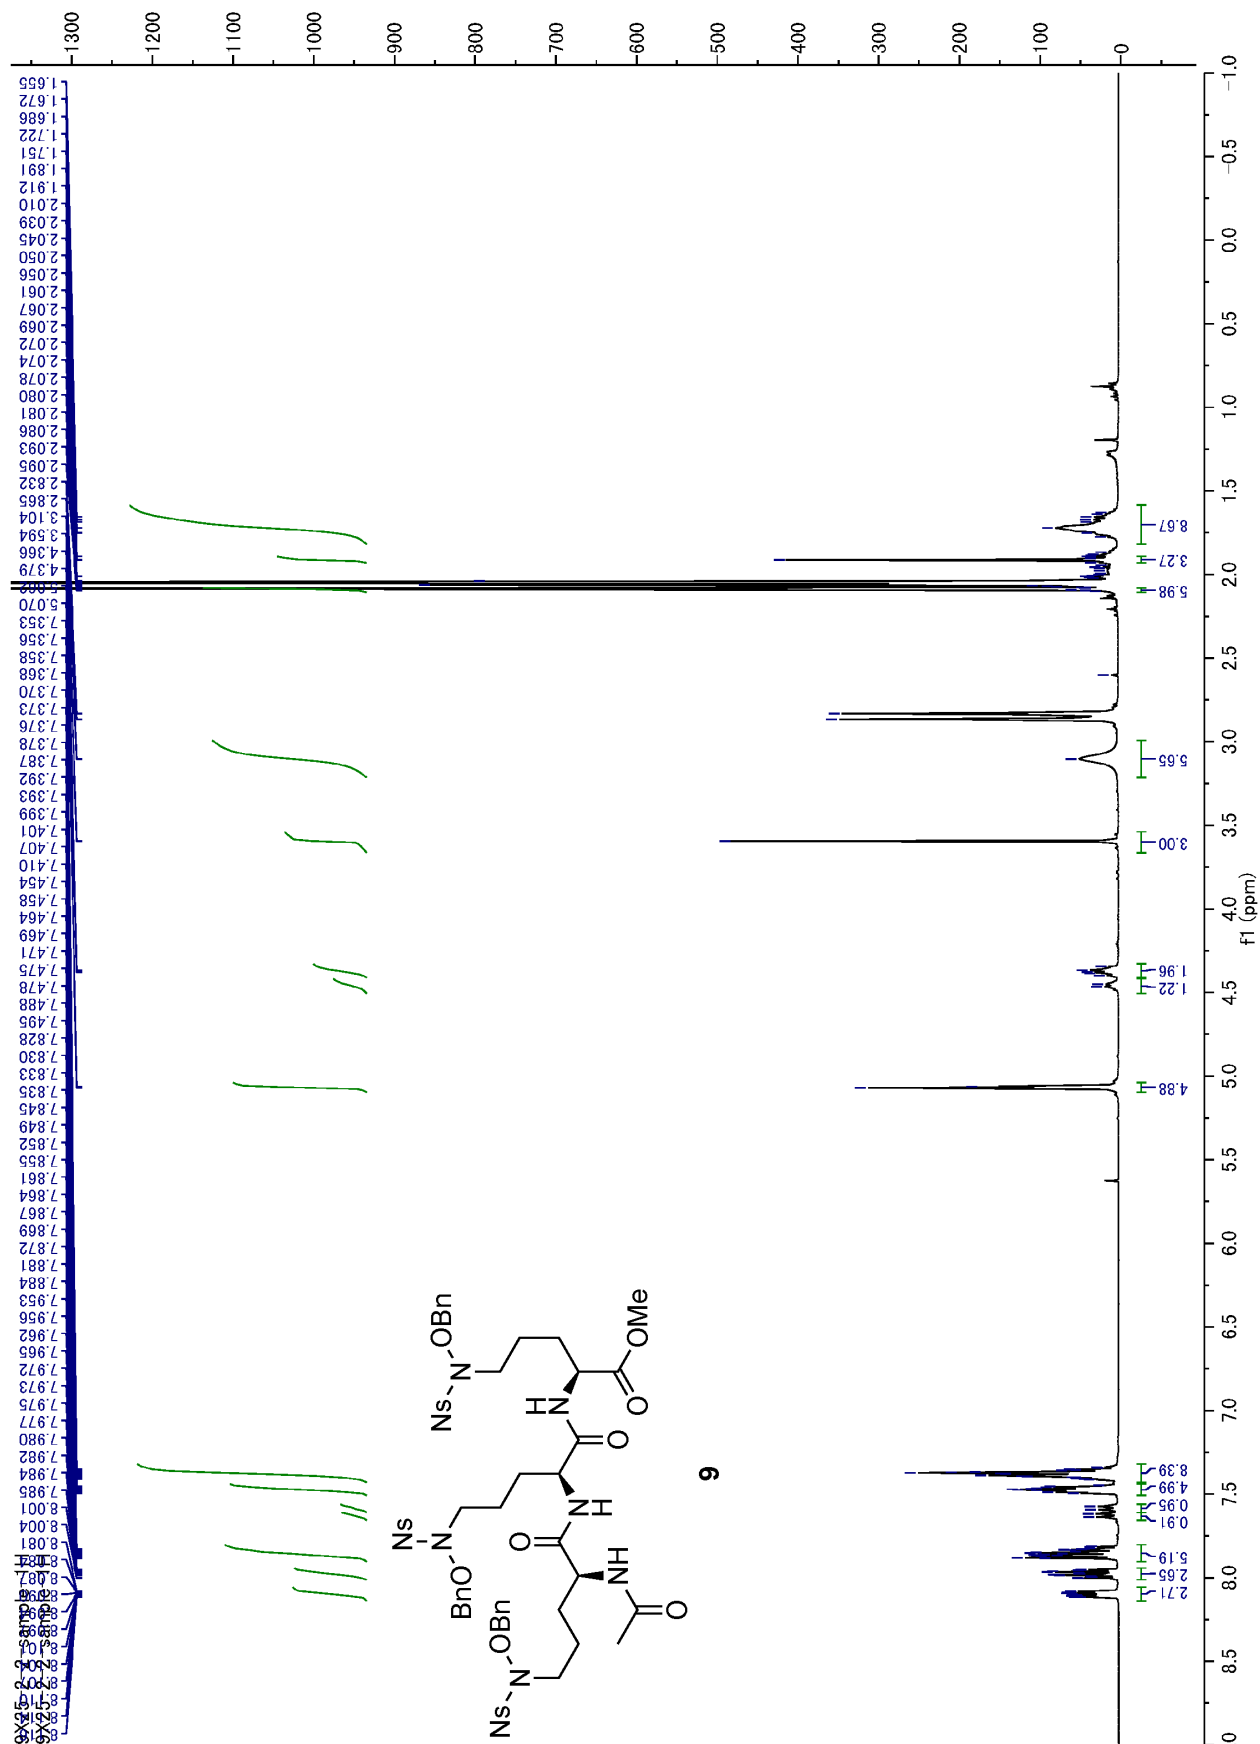

$^1\text{H}$  NMR spectra of **9** (400 MHz,  $\text{acetone-}d_6$ )

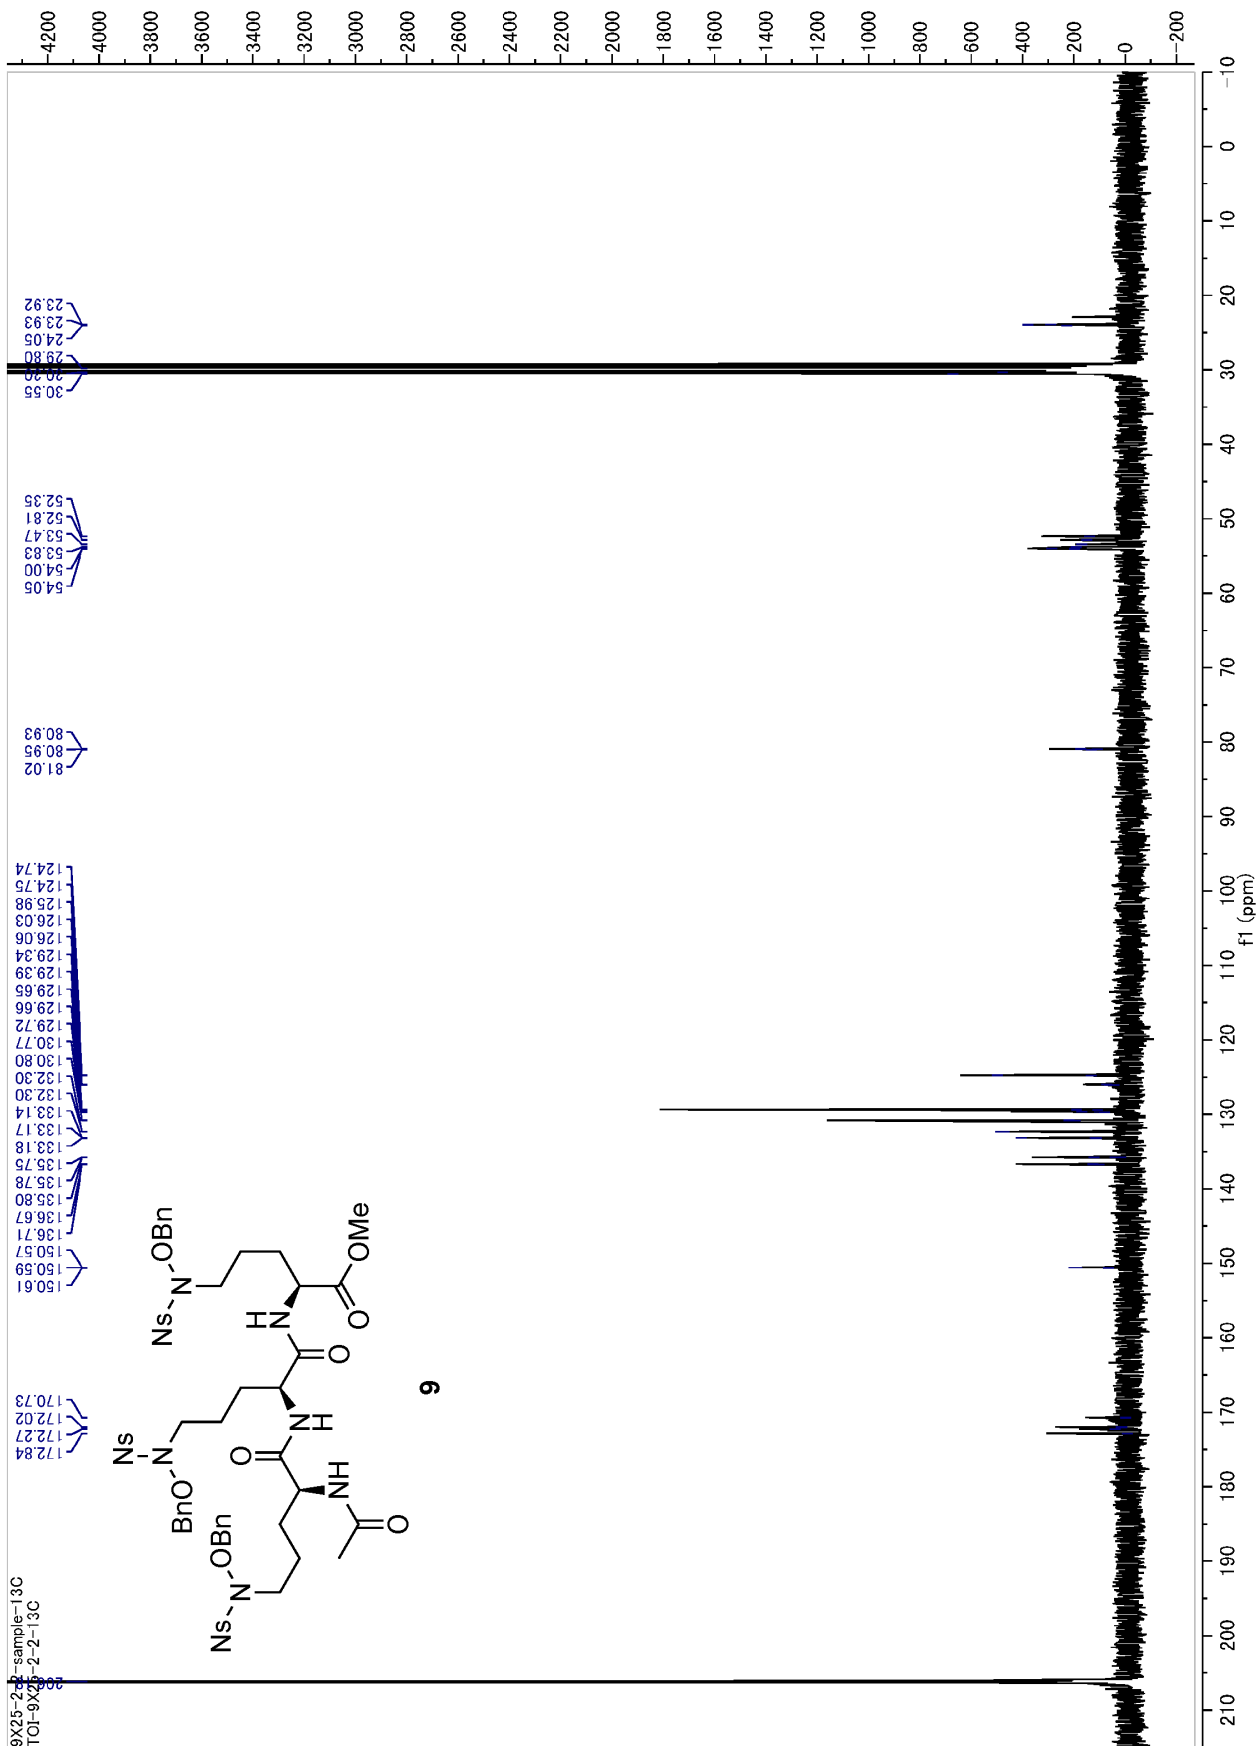

<sup>13</sup>C NMR spectra of **9** (100 MHz, acetone-*d*<sub>6</sub>)

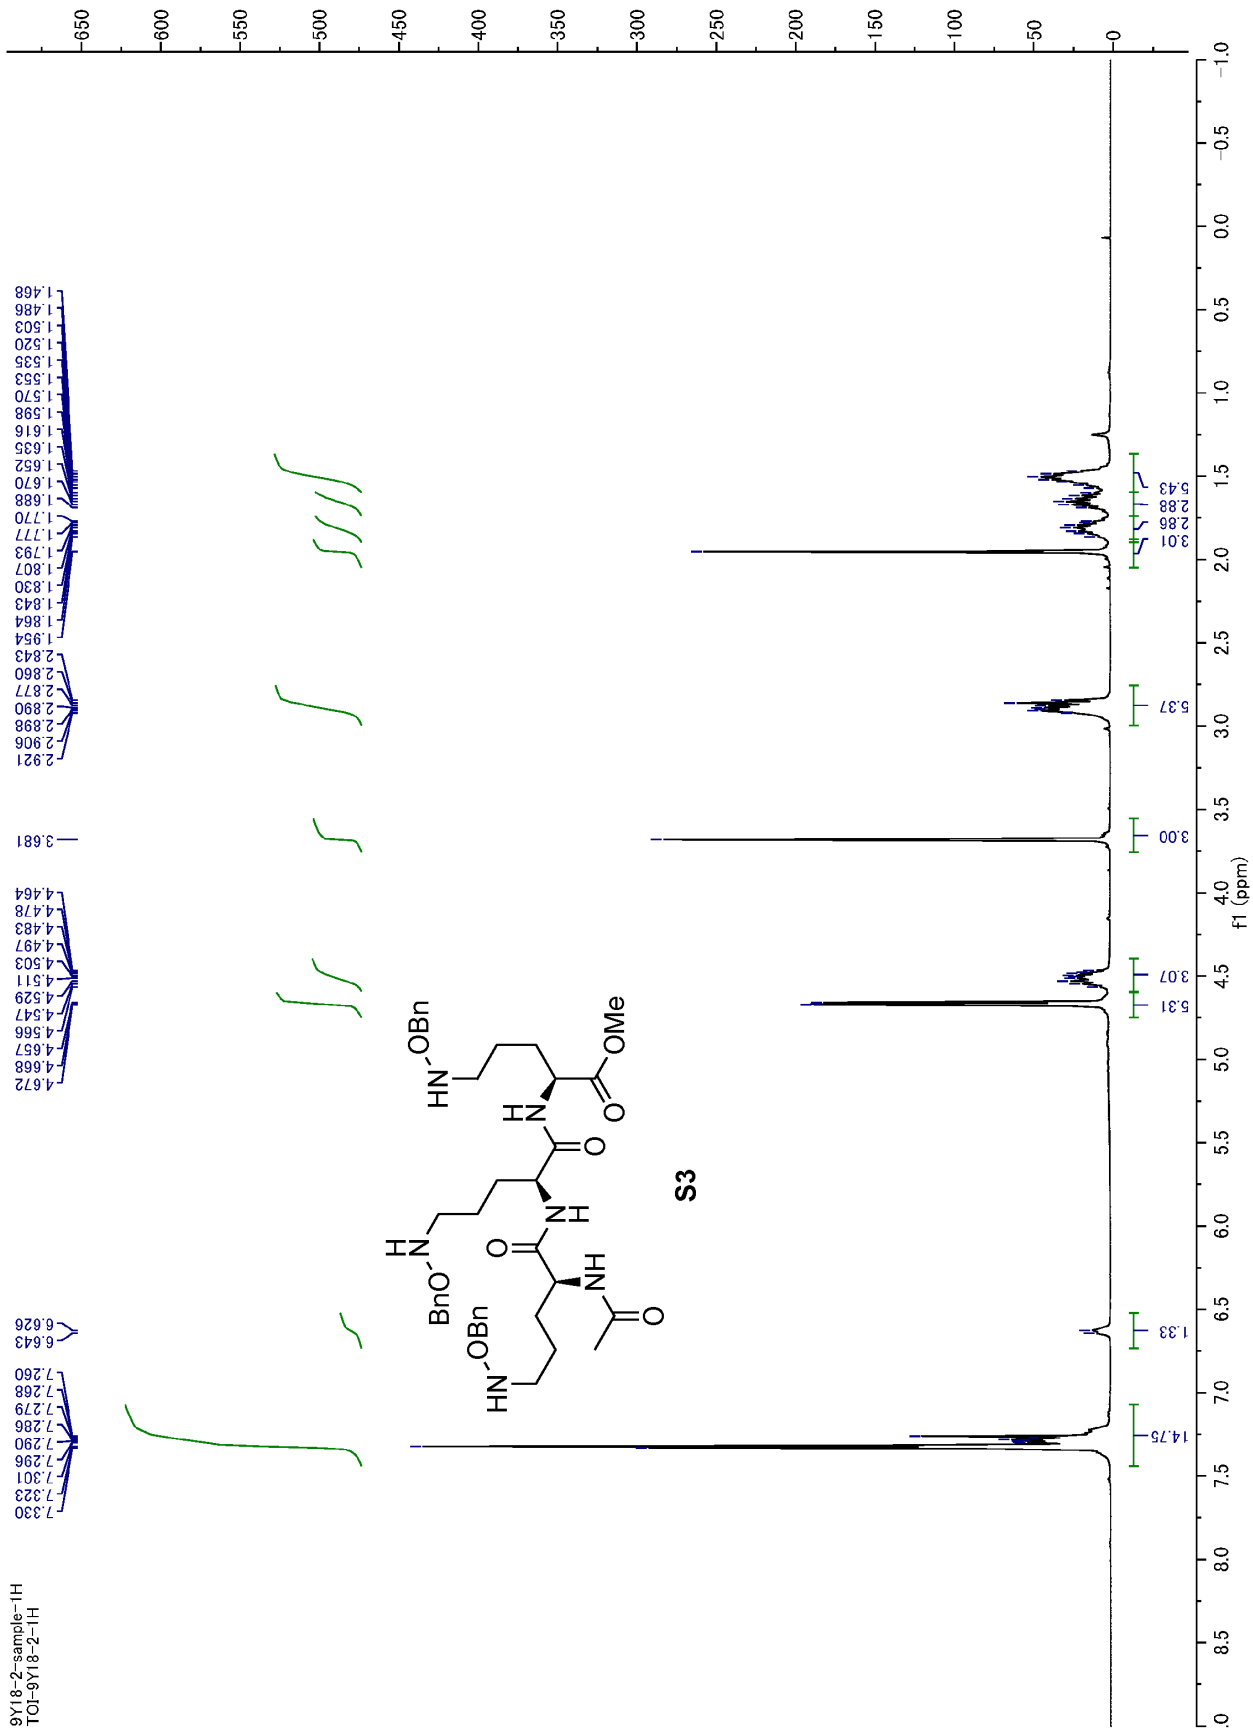

<sup>1</sup>H NMR spectra of S3 (400 MHz, CDCl<sub>3</sub>)

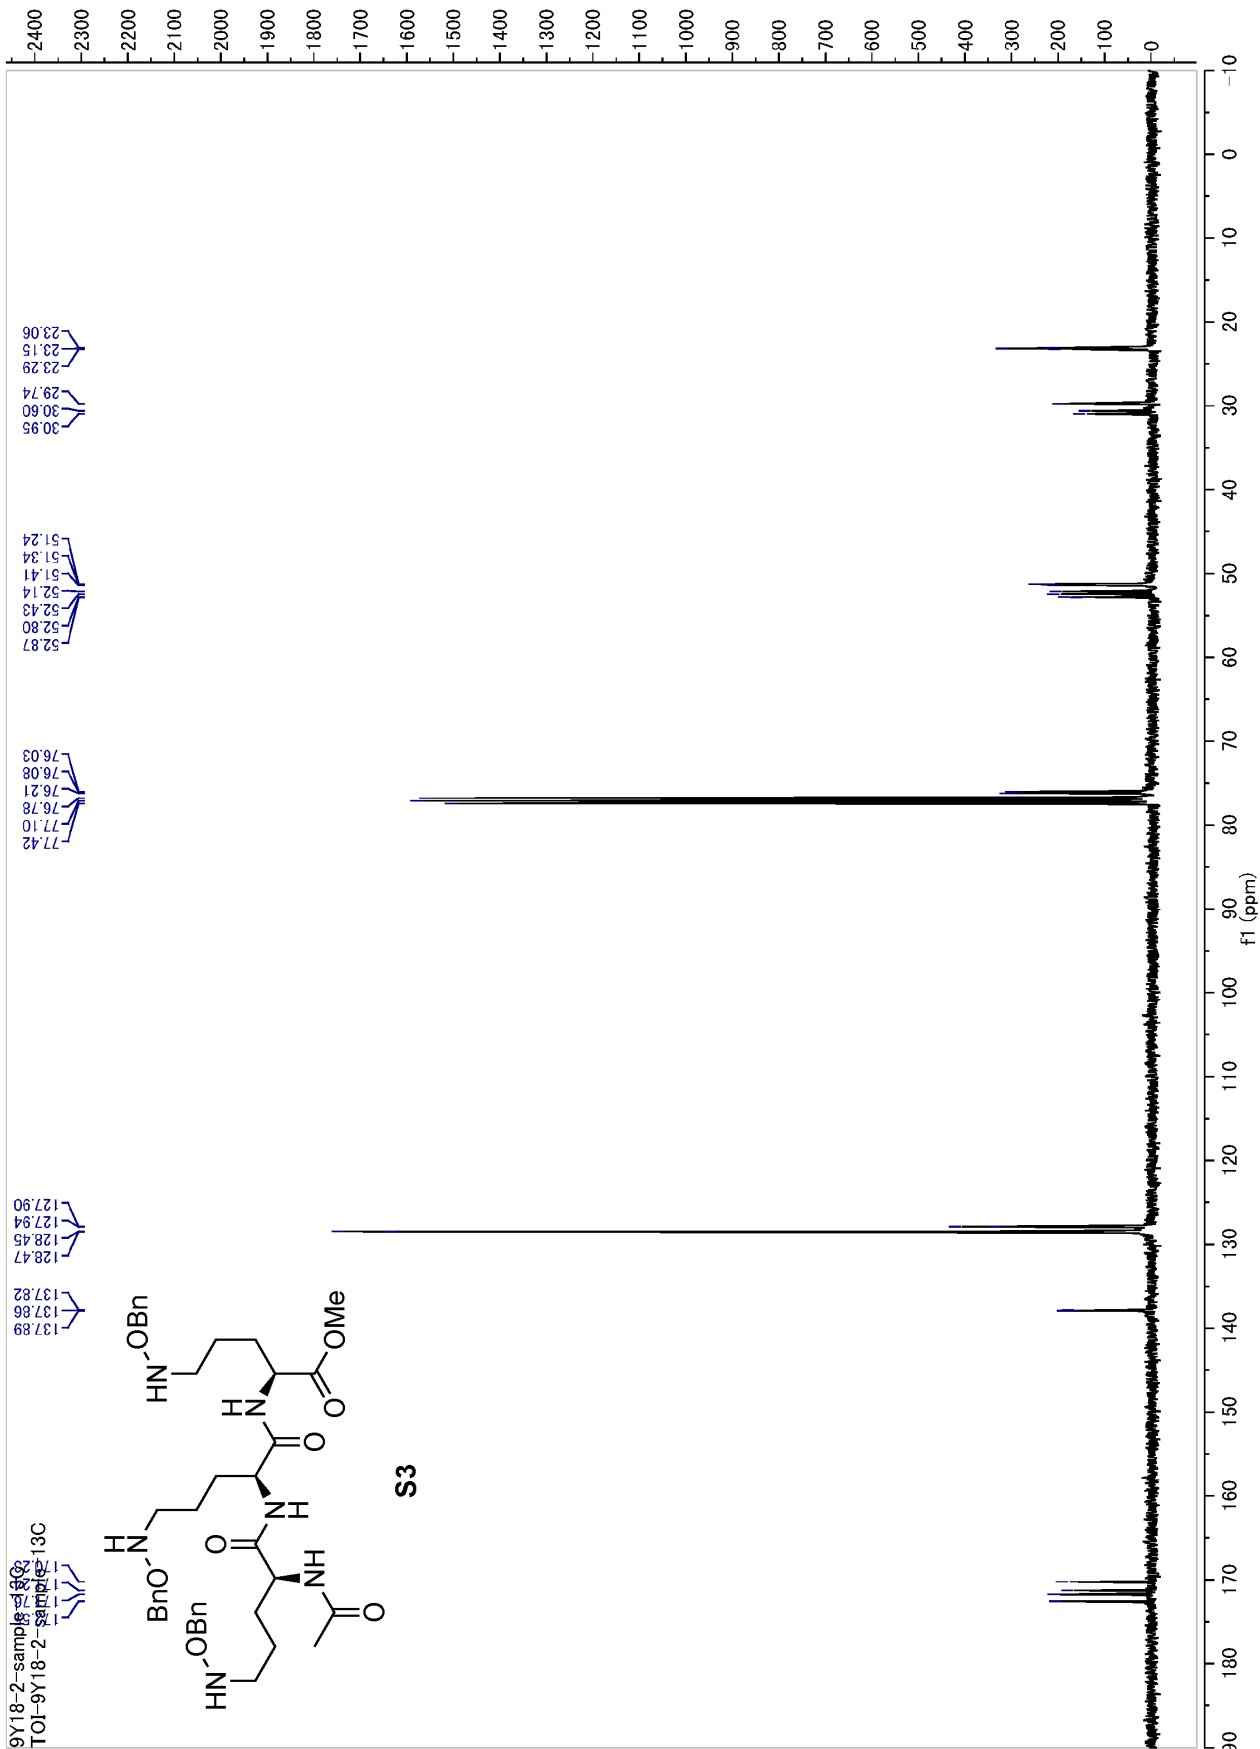

<sup>13</sup>C NMR spectra of **S3** (100 MHz, CDCl<sub>3</sub>)

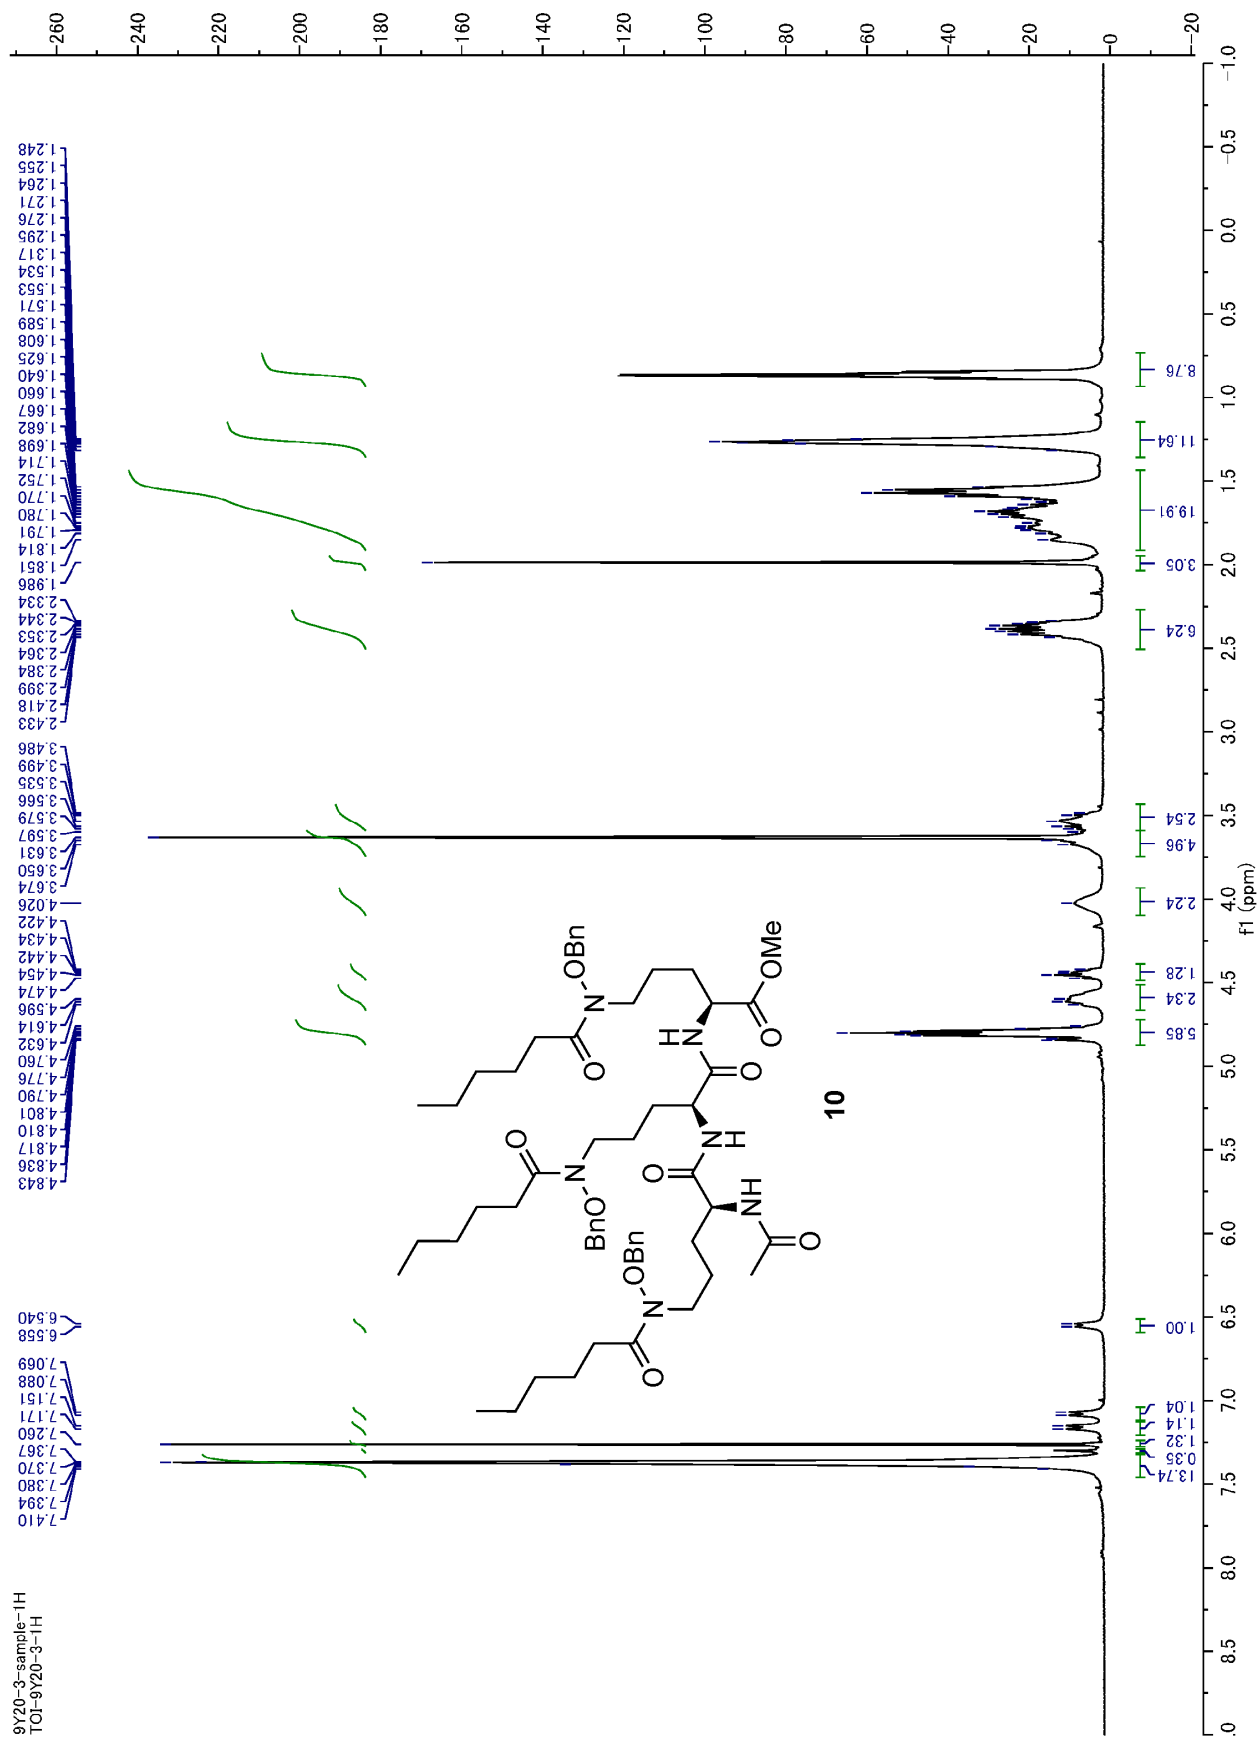

<sup>1</sup>H NMR spectra of **10** (400 MHz, CDCl<sub>3</sub>)

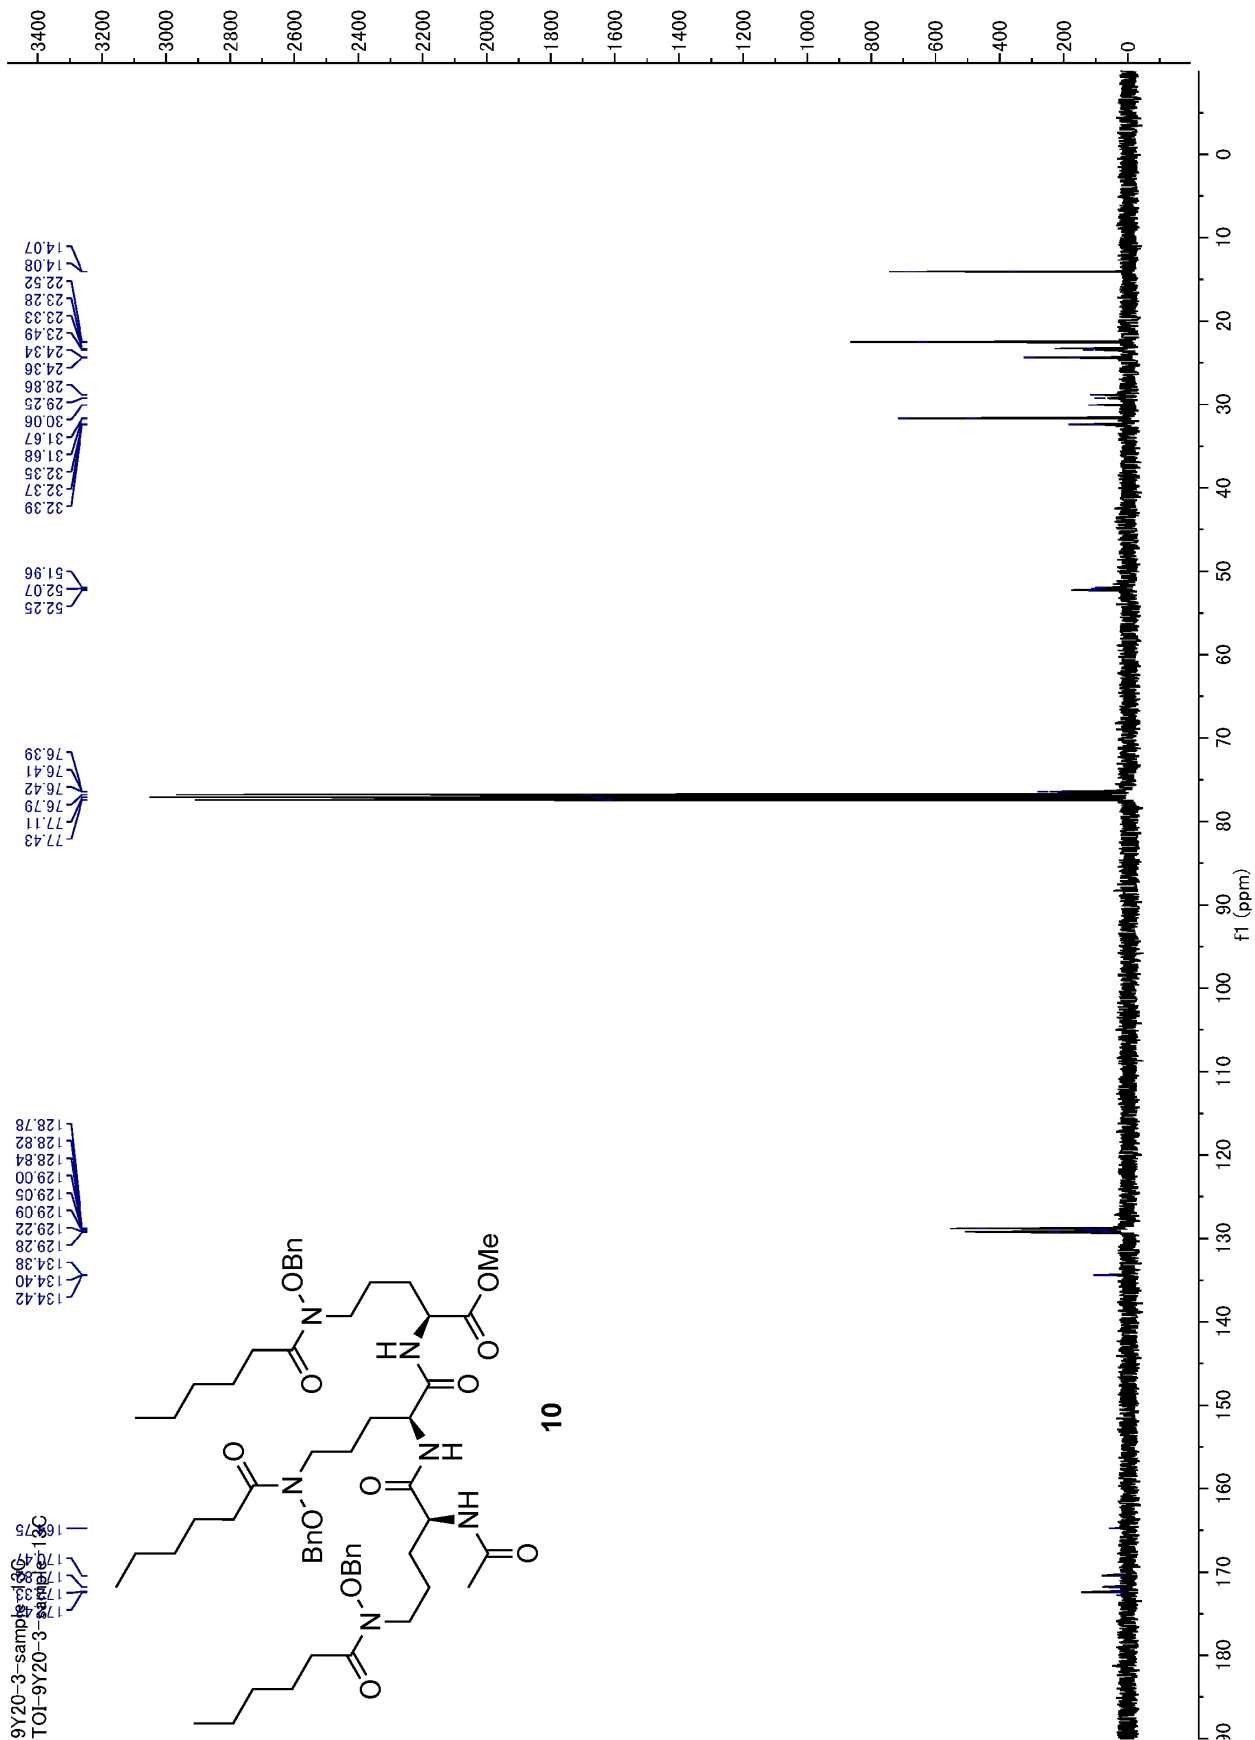

$^{13}\text{C}$  NMR spectra of **10** (100 MHz,  $\text{CDCl}_3$ )

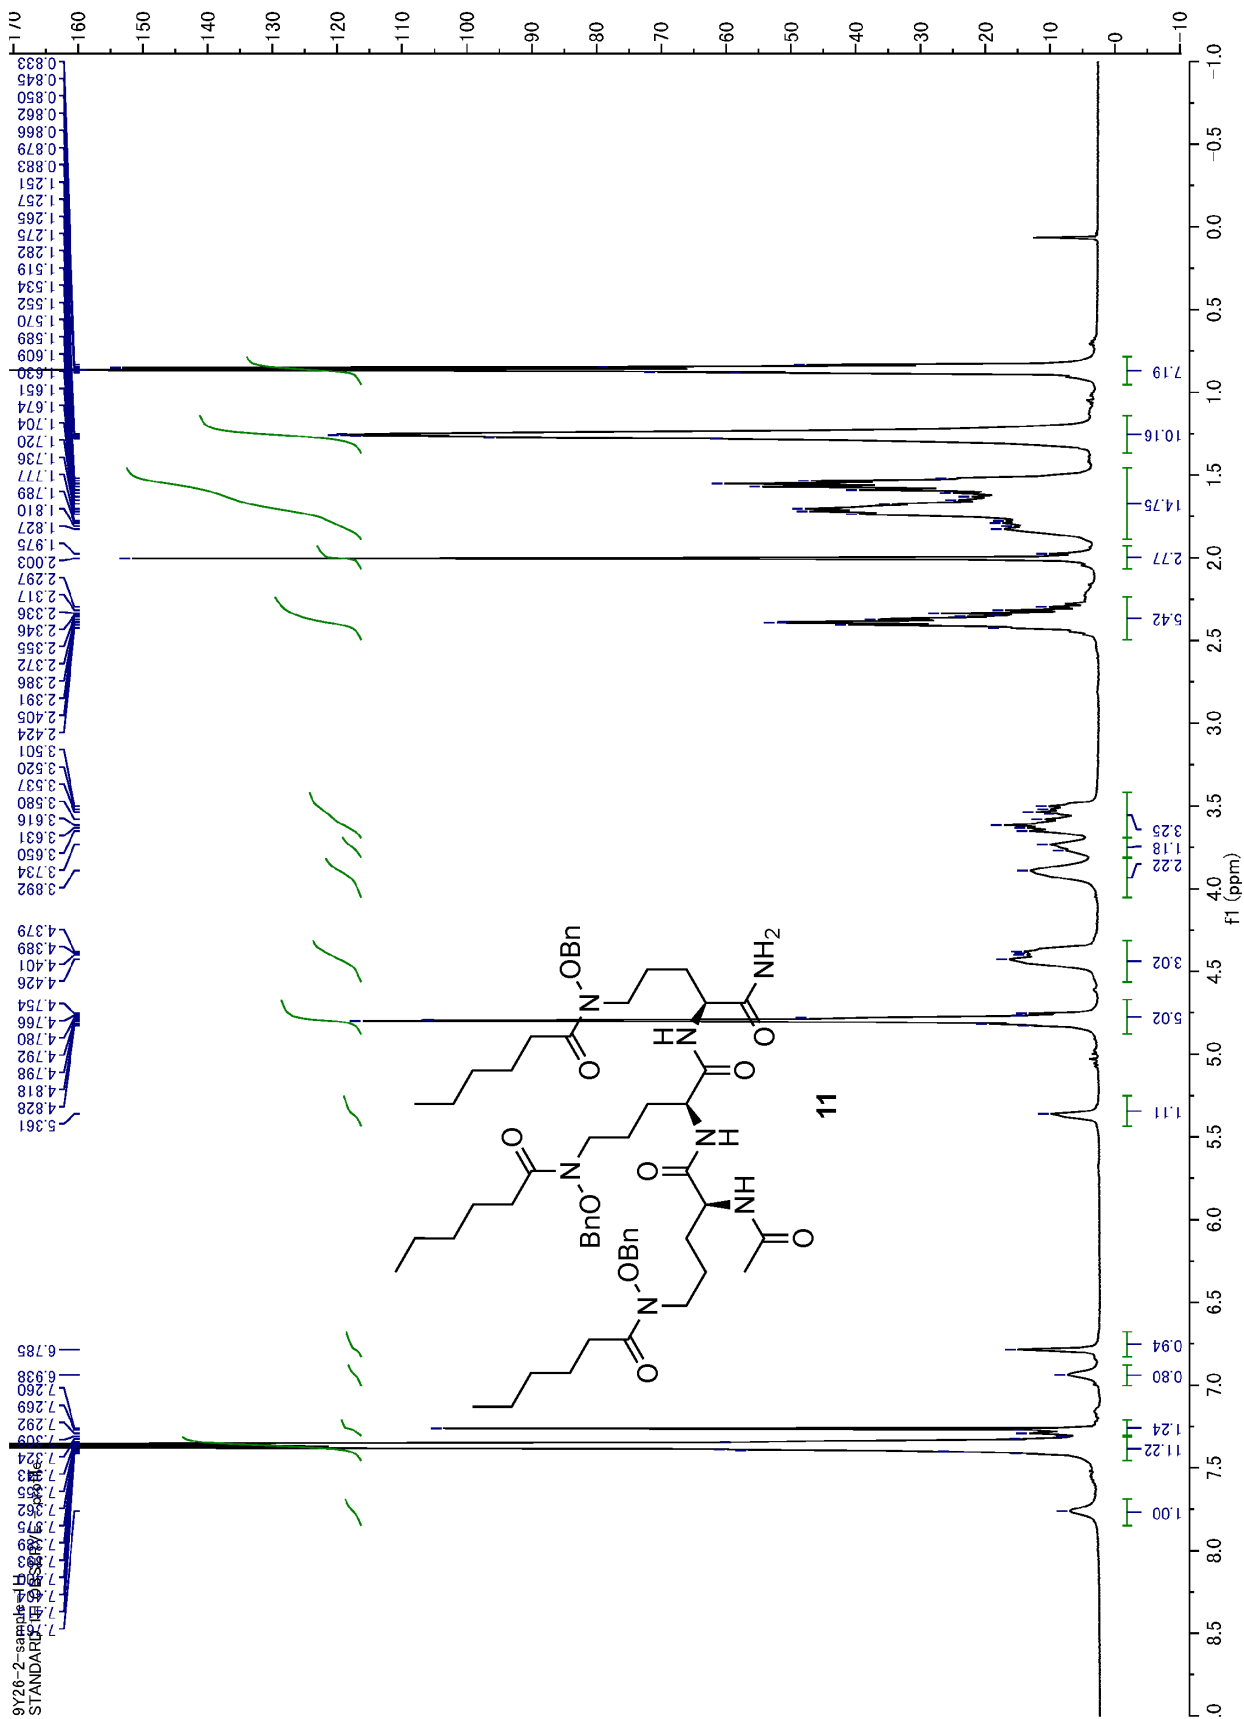

$^1\text{H}$  NMR spectra of **11** (400 MHz,  $\text{CDCl}_3$ )



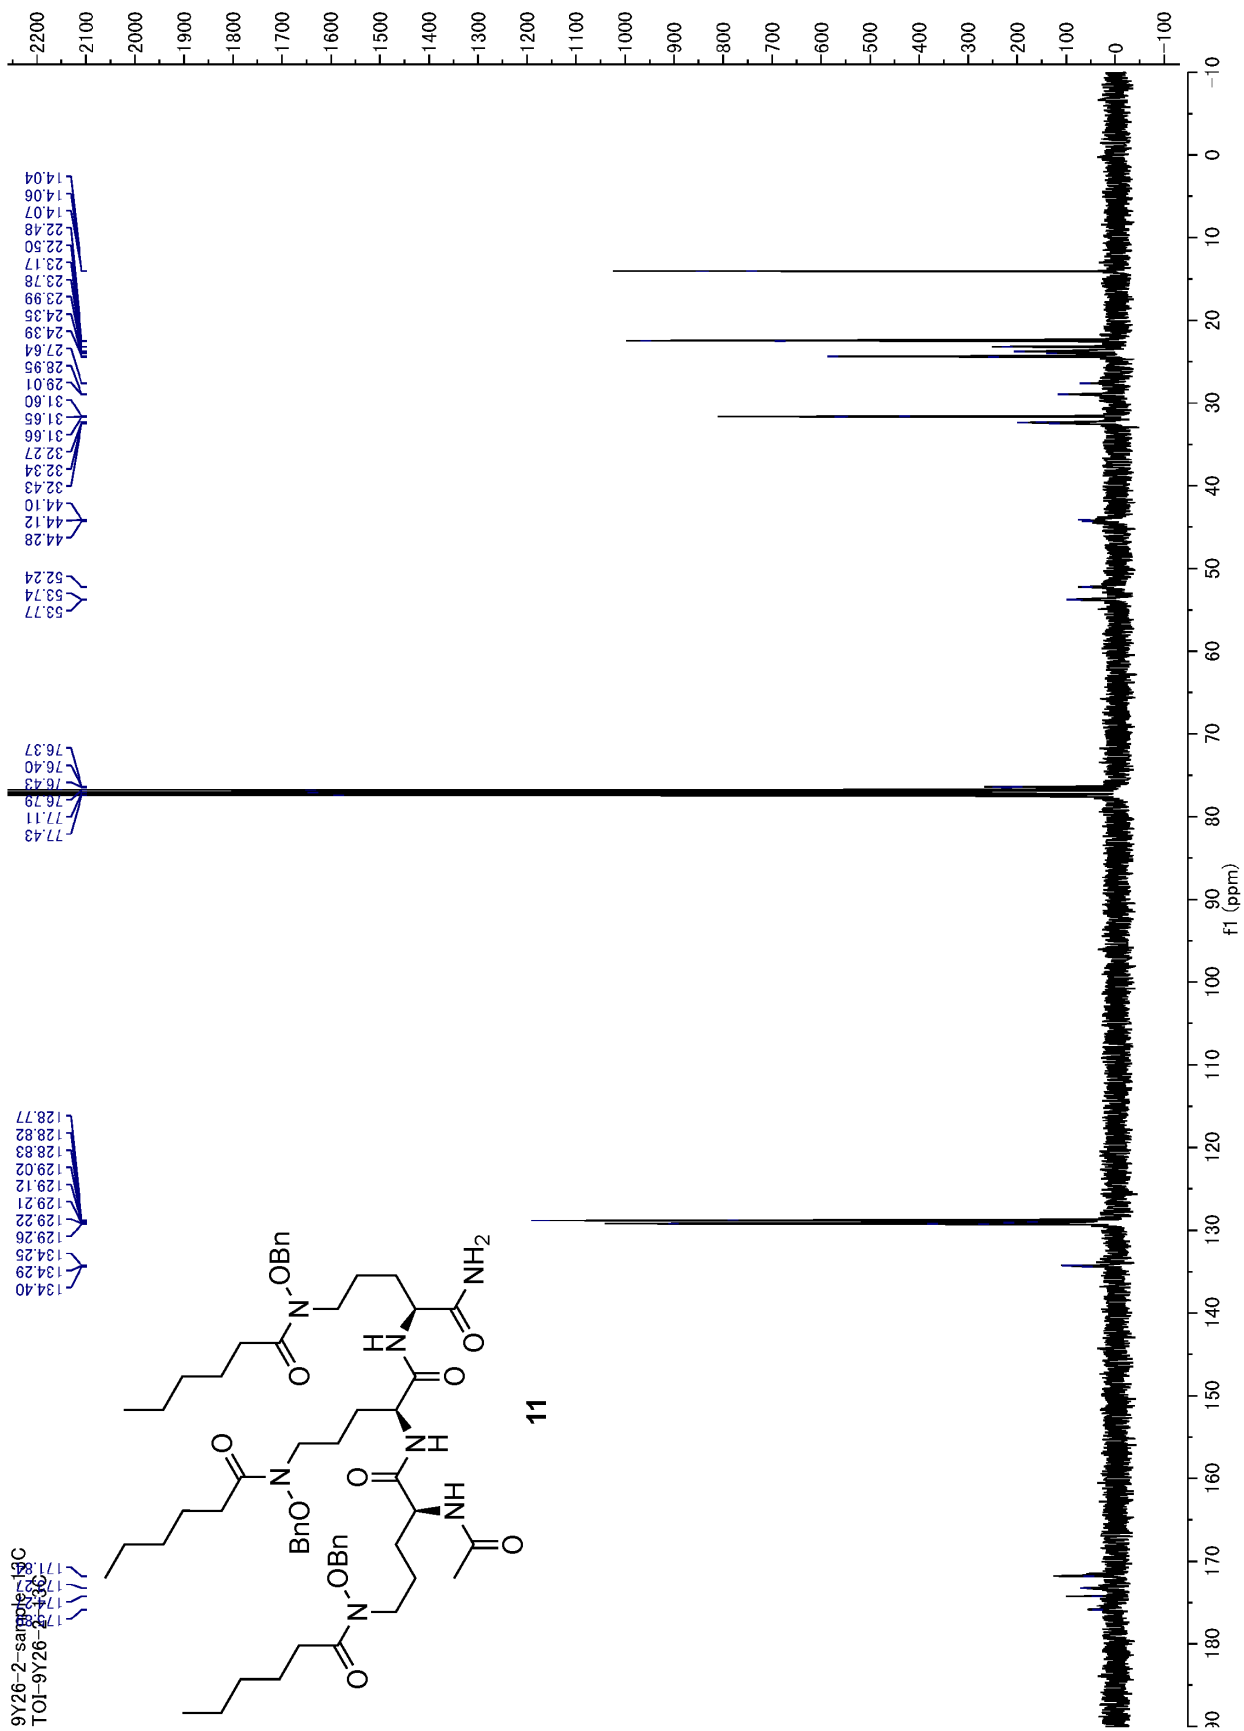

<sup>13</sup>C NMR spectra of **11** (100 MHz, CDCl<sub>3</sub>)

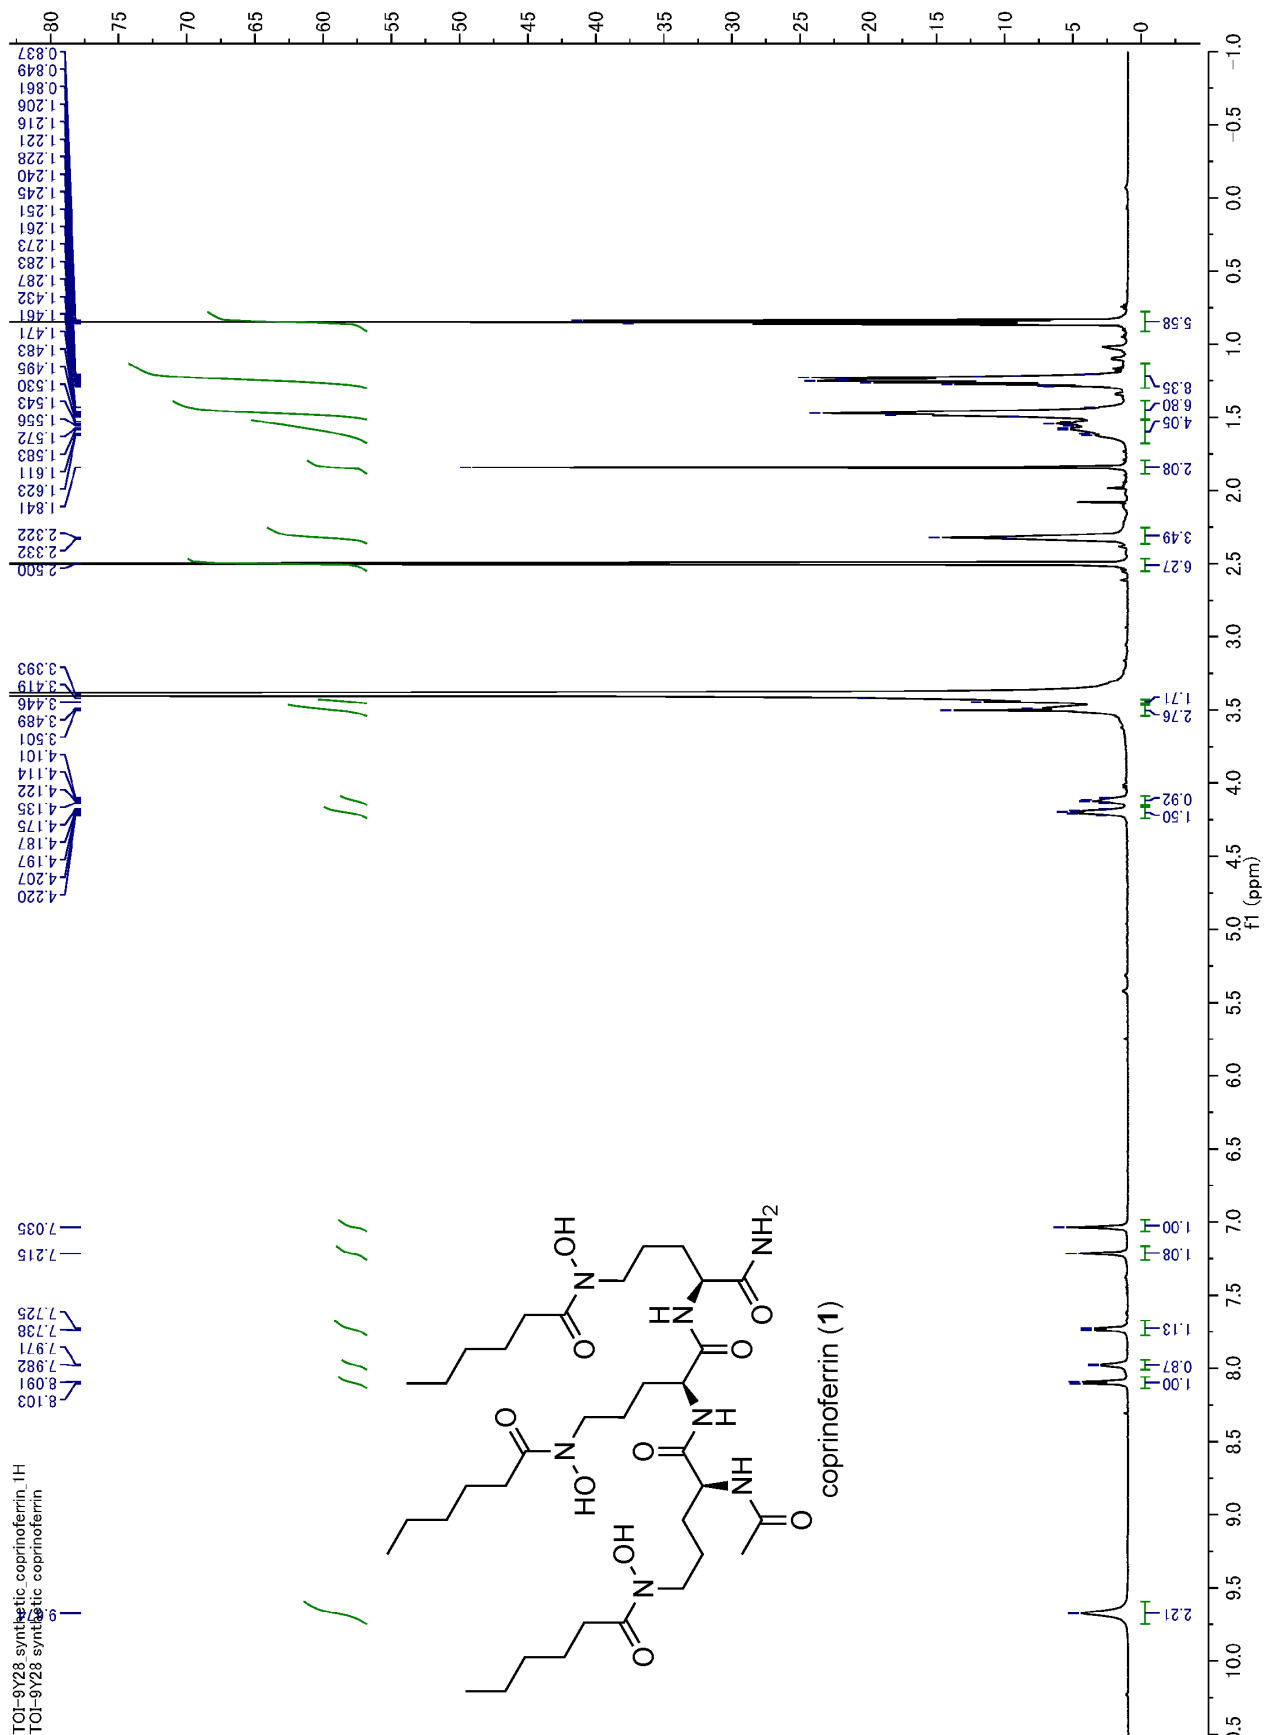

$^1\text{H}$  NMR spectra of coprinoferrin (1) (600 MHz,  $\text{DMSO-}d_6$ )

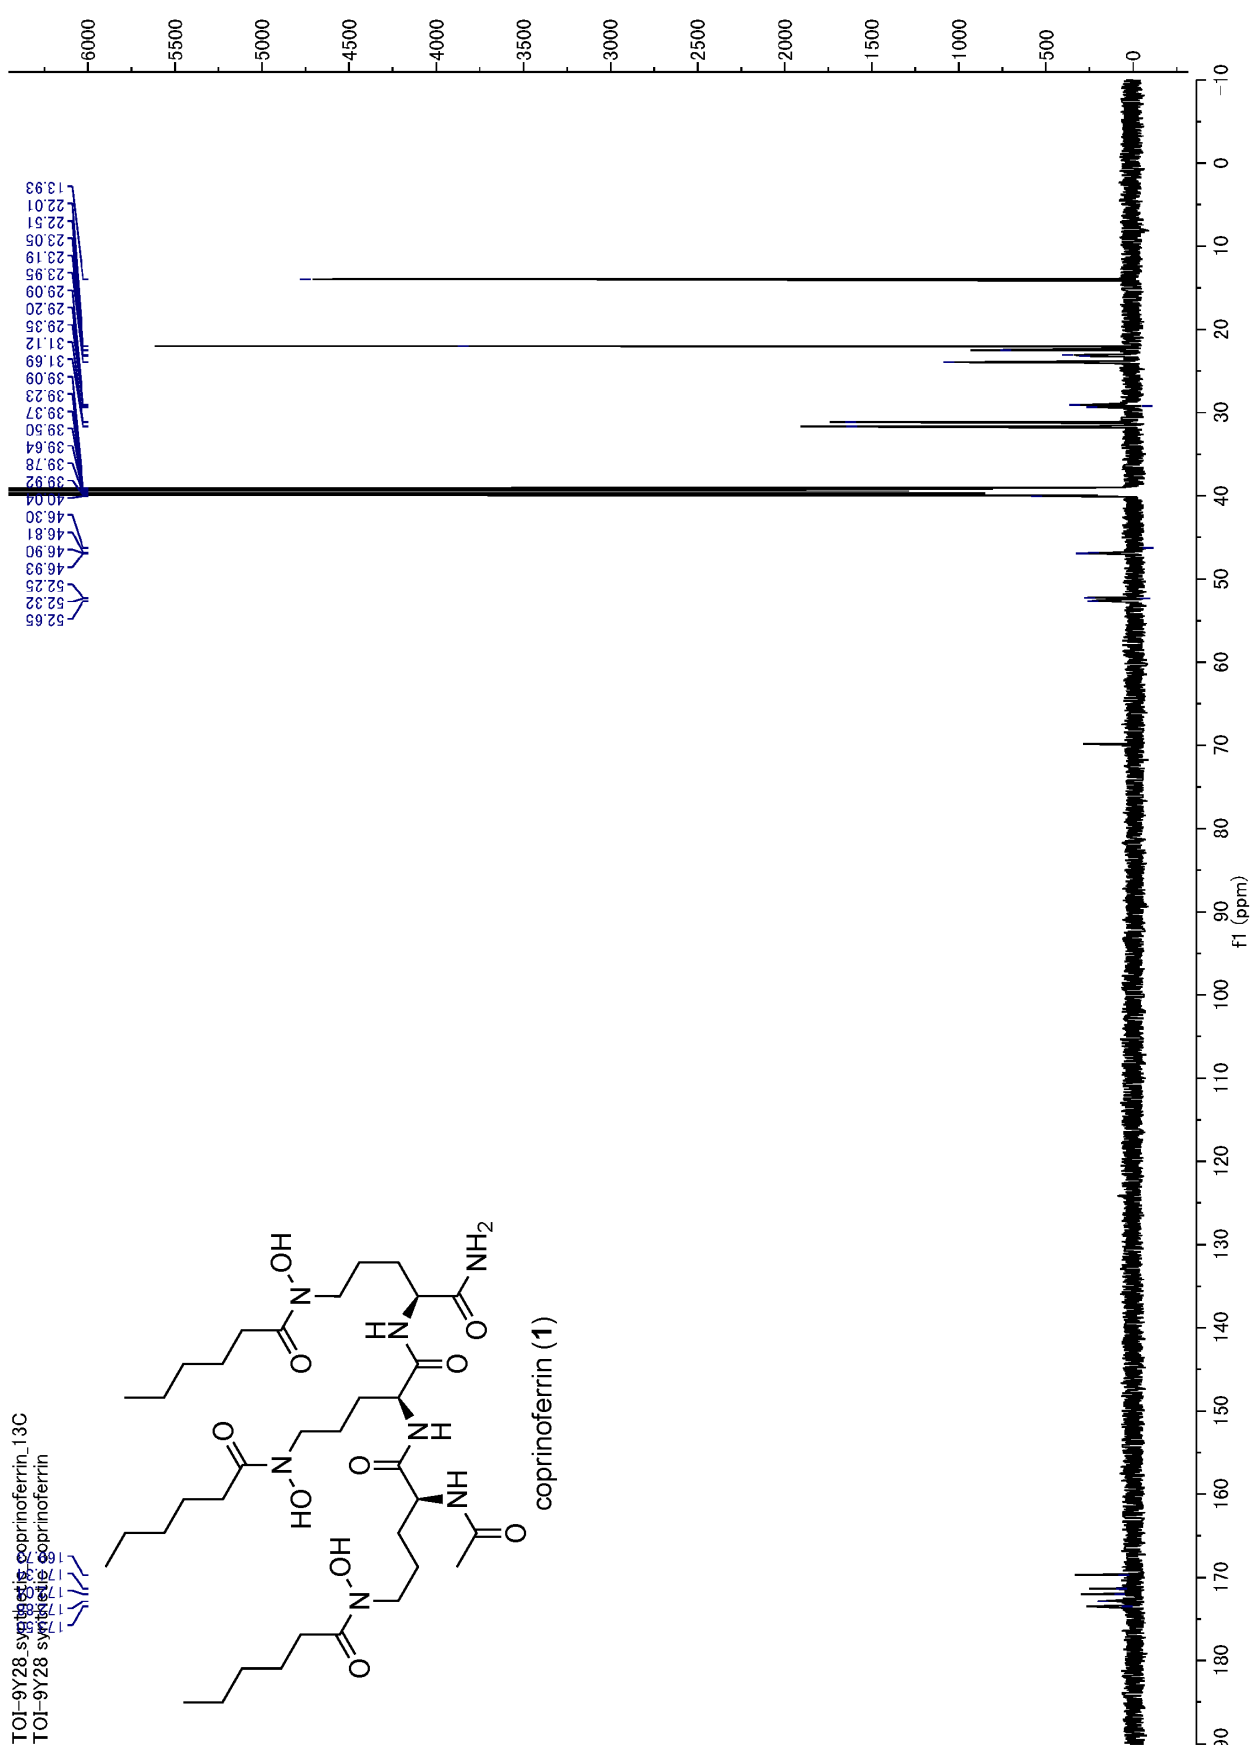

<sup>13</sup>C NMR spectra of coprinoferrin (1) (150 MHz, DMSO-d<sub>6</sub>)

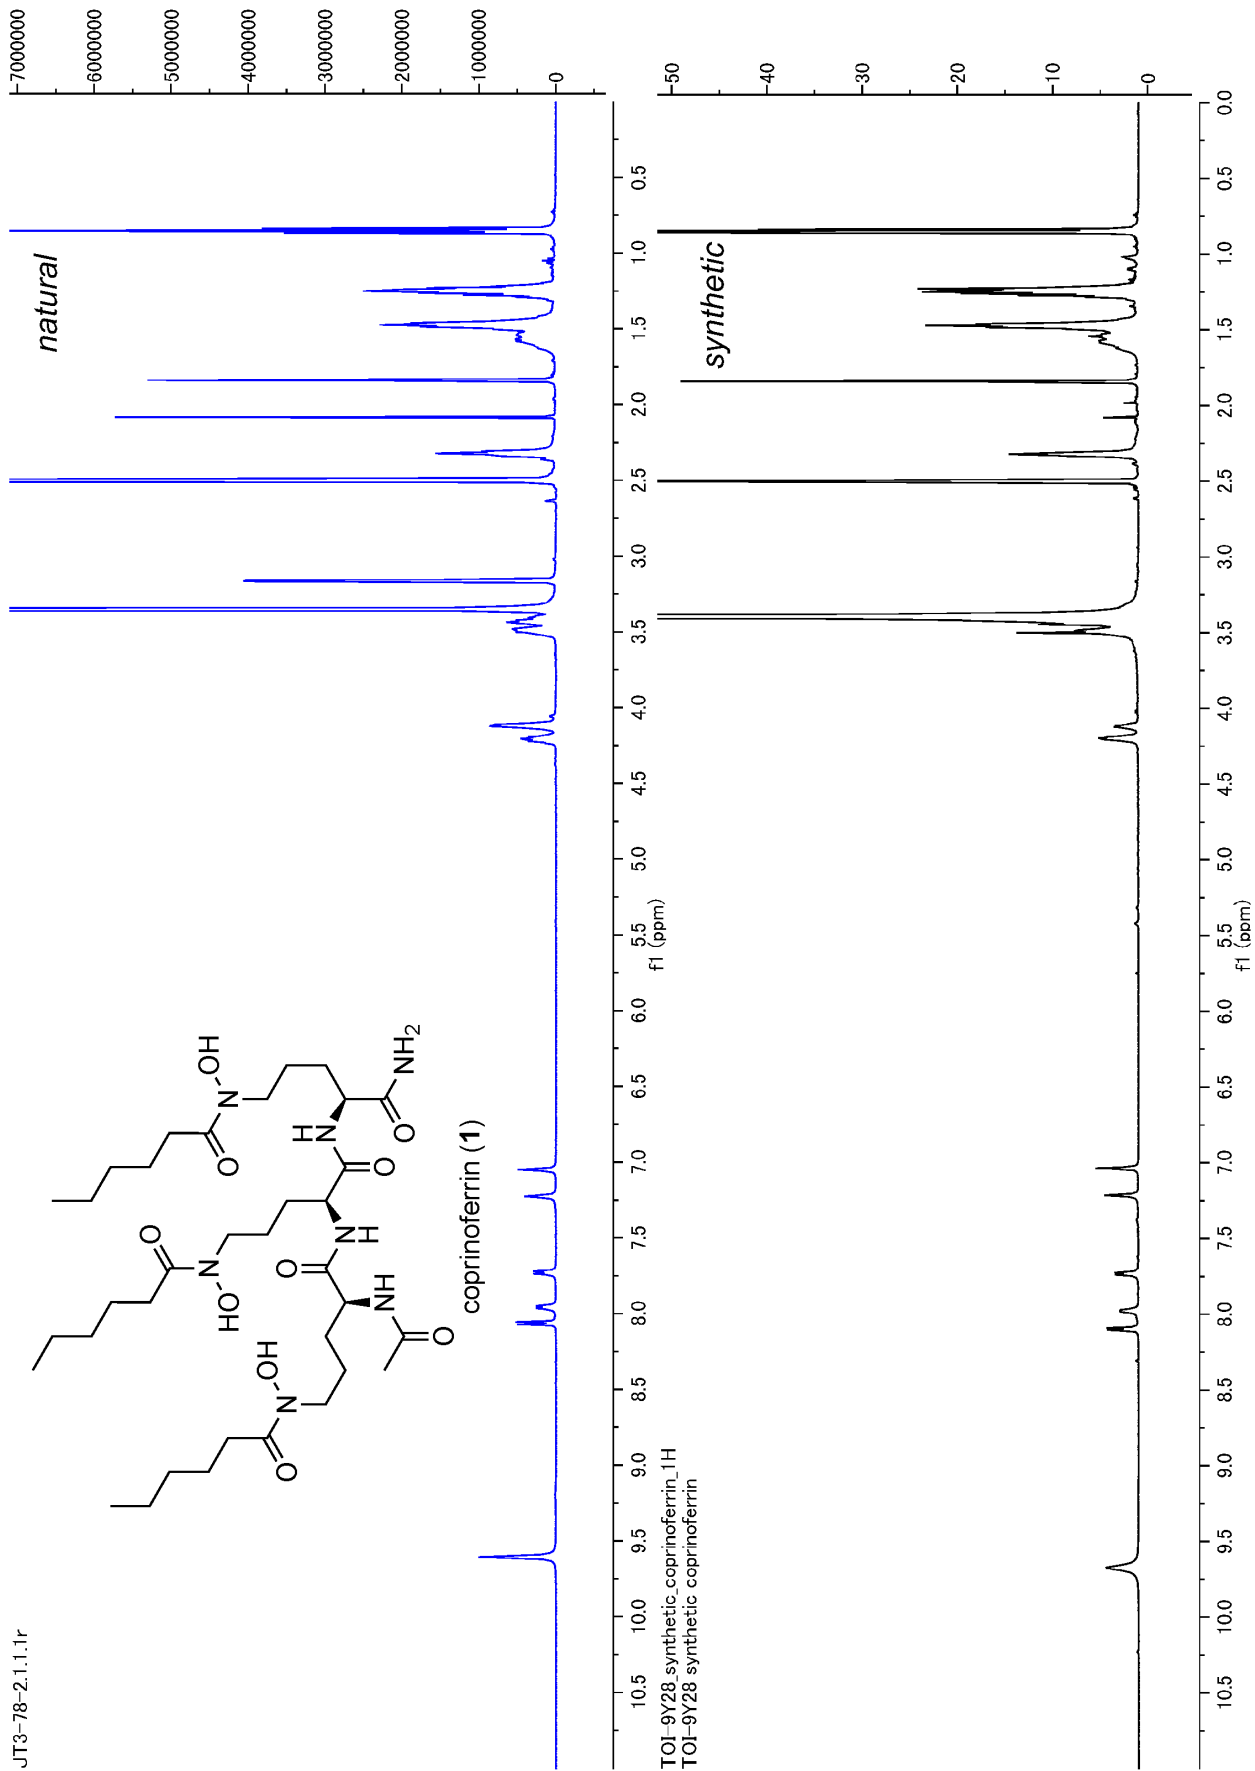

$^1\text{H}$  NMR spectra of coprinoferrin (**1**) [upper: natural product (500 MHz,  $\text{DMSO-}d_6$ ); lower: synthetic sample (600 MHz,  $\text{DMSO-}d_6$ )]

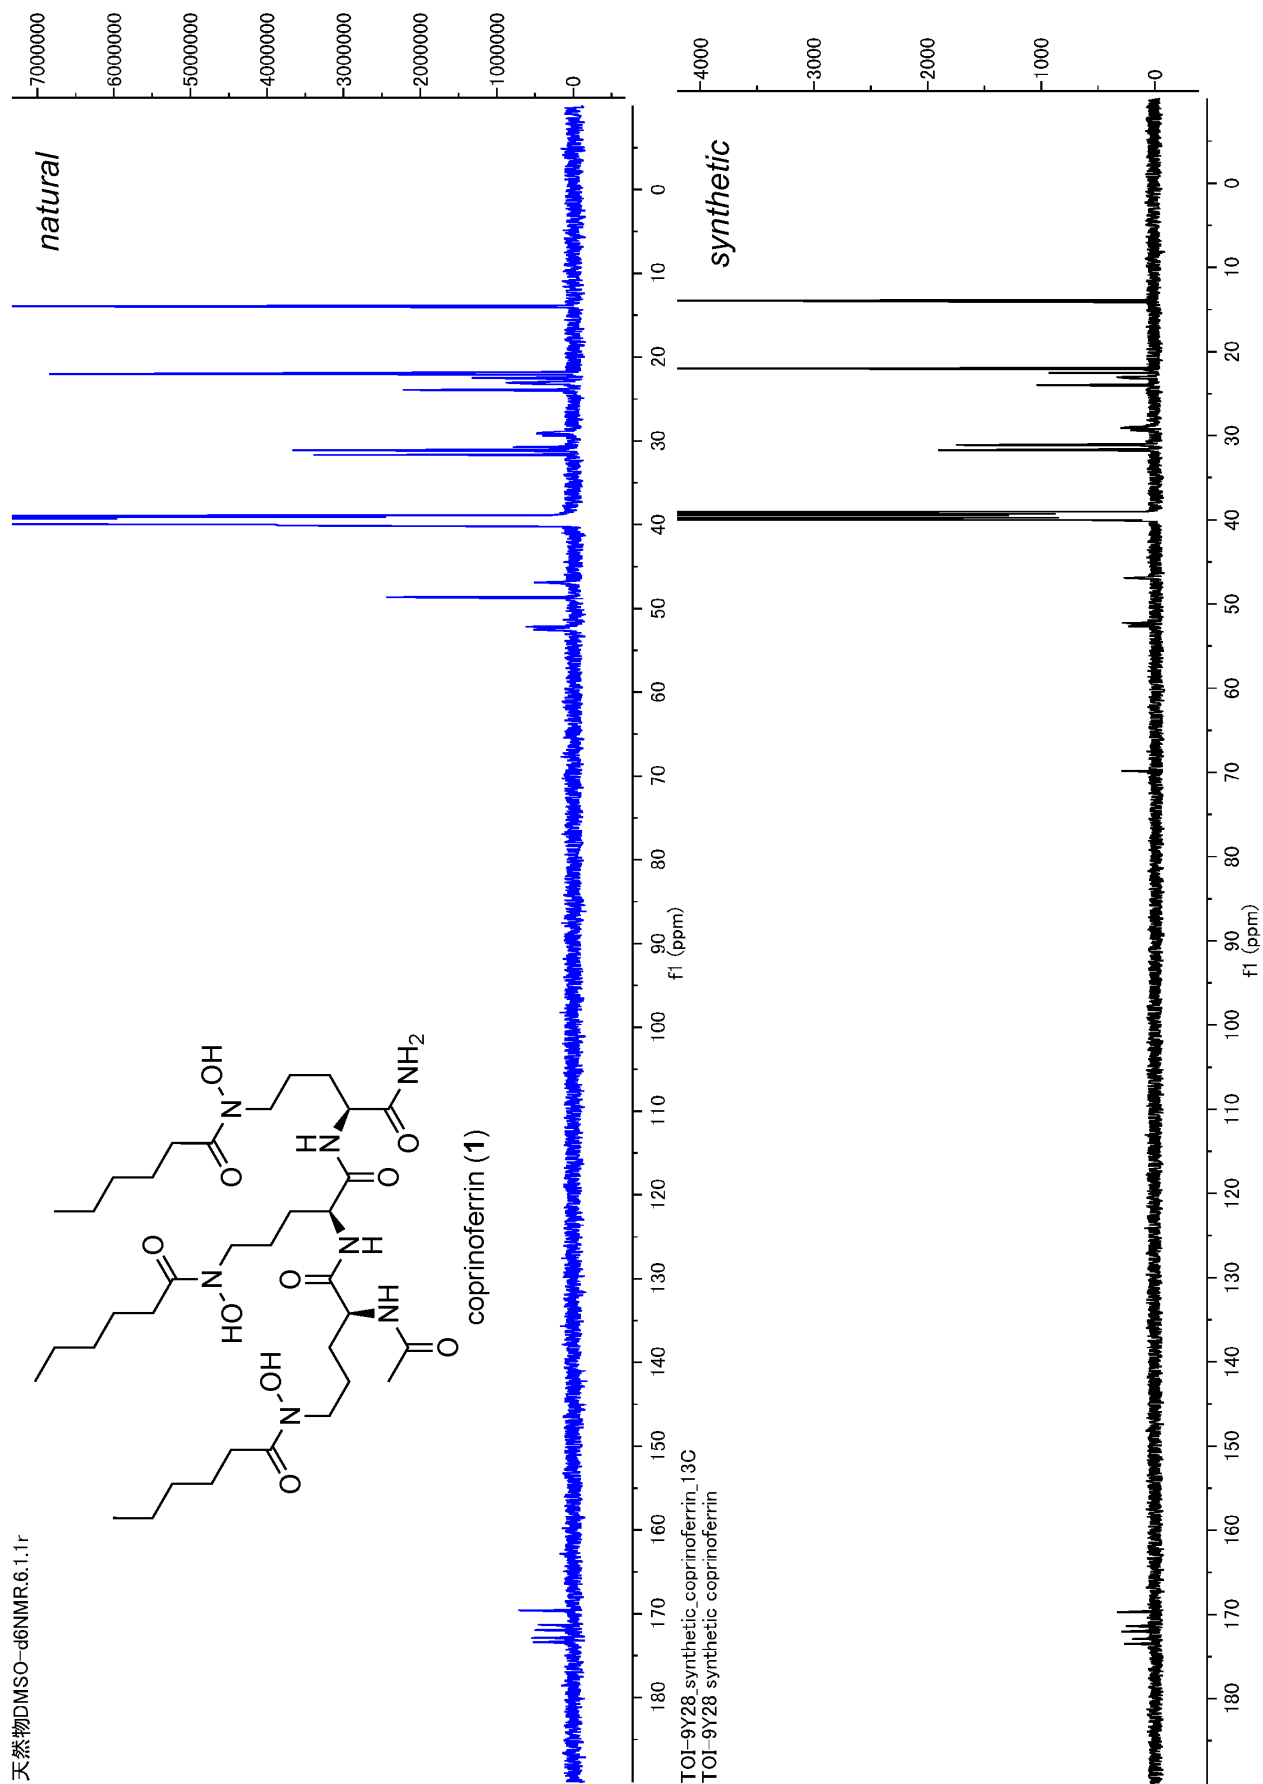

<sup>1</sup>H NMR spectra of coprinoferrin (1) [upper: natural product (125 MHz, DMSO-*d*<sub>6</sub>); lower: synthetic sample (150 MHz, DMSO-*d*<sub>6</sub>)]

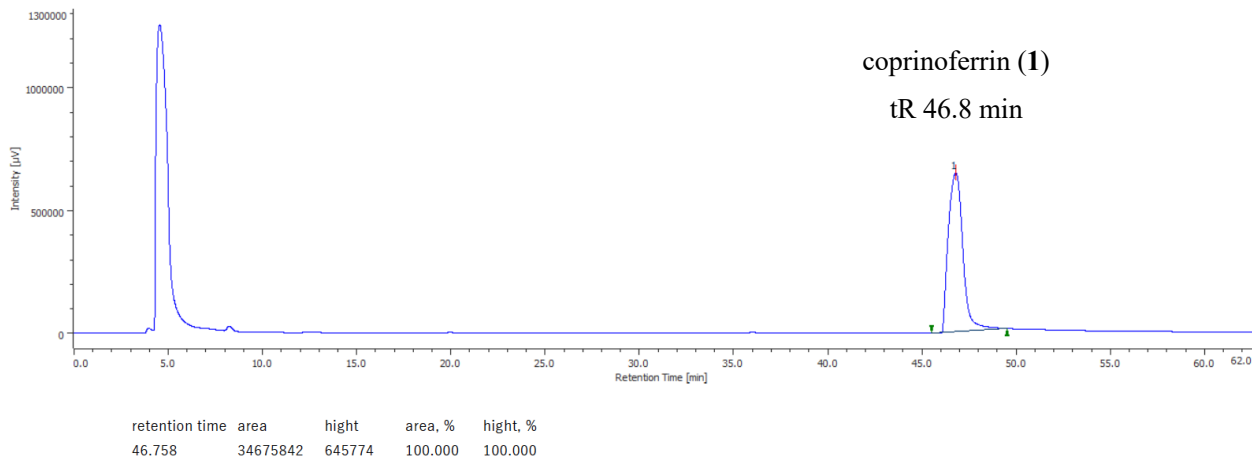

Preparative HPLC chart of synthetic coprinoferrin (1): column: nacalai teque COSMOSIL 5C<sub>18</sub>-MS-II (φ20×250 mm), solvent: 35% MeCN aq., detection: UV 215 nm; flow rate 11.0 ml/min
